# Supplementary material
Source: PubMed Central journal article supplement (PMC5482232)
Supplement: NIHMS858939-supplement-Supplemental_Figures.pdf [file NIHMS858939-supplement-Supplemental_Figures.pdf]

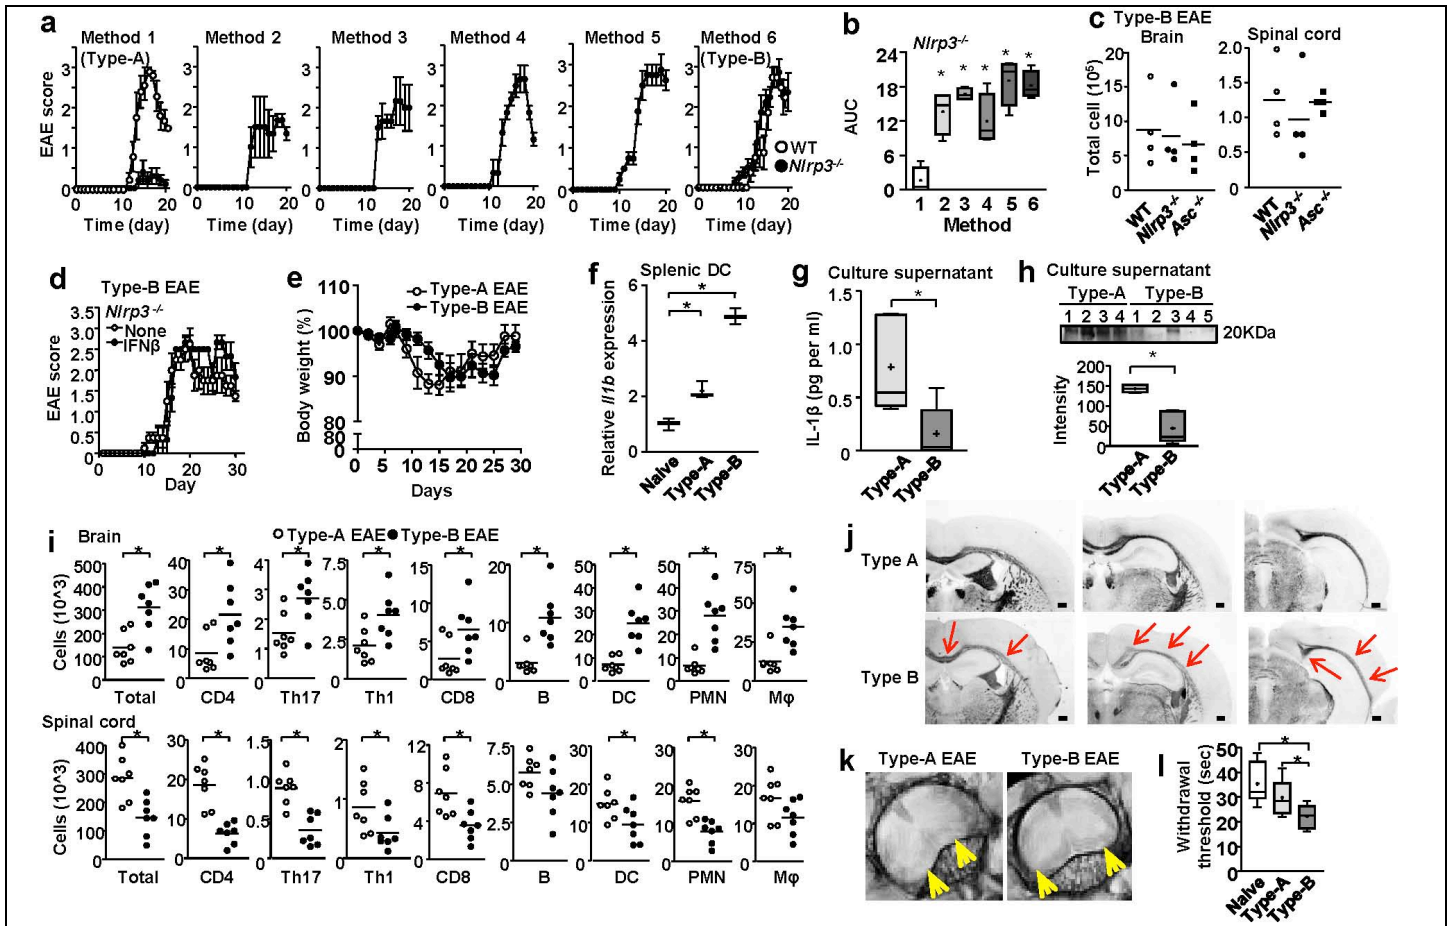

**Supplementary Figure 1**

**EAE induced by several immunization methods and phenotypes on cell migration, demyelination and nociceptive sensitivity in mice with Type-A and Type-B EAE.**

(a) EAE severity in *Nlrp3*<sup>-/-</sup> mice was evaluated. EAE was induced with 6 different methods, as indicated in Online Methods. (b) AUC between 0 and 20-dpi. Method 1 (*n*=4), Method 2-6 (*n*=5).  $P_{(Method\ 1\ vs\ 2)}=0.0006$ ,  $t(7)=5.98$ ,  $P_{(Method\ 1\ vs\ 3)}<0.0001$ ,  $t(7)=12.54$ ,  $P_{(Method\ 1\ vs\ 4)}=0.0027$ ,  $t(7)=4.54$ ,  $P_{(Method\ 1\ vs\ 5)}<0.0001$ ,  $t(7)=8.15$ ,  $P_{(Method\ 1\ vs\ 6)}<0.0001$ ,  $t(7)=10.63$ . (c) Numbers of total immune cells were evaluated in the brains and spinal cords (S.C.) of mice with Type-B EAE at 17-dpi. *n*=4. Brain:  $P_{(WT\ vs\ Nlrp3^{-/-})}=0.8159$ ,  $t(6)=0.2433$ ,  $P_{(WT\ vs\ Asc^{-/-})}=0.5685$ ,  $t(6)=0.6031$ . Spinal cord:  $P_{(WT\ vs\ Nlrp3^{-/-})}=0.5226$ ,  $t(6)=0.6787$ ,  $P_{(WT\ vs\ Asc^{-/-})}=0.8984$ ,  $t(6)=0.1332$ . (d) IFN $\beta$  treatment on *Nlrp3*<sup>-/-</sup> mice with Type-B EAE induced with Method 6. IFN $\beta$  ( $3 \times 10^4$  unit/mouse) were *i.p.* injected every other day from day 0 to 8 as previously performed. (e) Time course on body weight change in Type-A and Type-B EAE. (f) *Il1b* mRNA levels in splenic DC from naive, Type-A, and Type-B EAE mice at 9 dpi.  $P_{(Naive\ vs\ Type-A)}=0.0059$ ,  $t(4)=5.344$ ,  $P_{(Naive\ vs\ Type-B)}<0.0001$ ,  $t(4)=18.55$ ,  $P_{(Type-A\ vs\ Type-B)}=0.0004$ ,  $t(4)=10.83$ . (g,h) Levels of extracellular IL-1 $\beta$  (f) and p20 caspase-1 (g) in 24h splenocyte culture supernatants (*n*=4 for Type-A, *n*=5 for Type-B).  $P=0.0261$ ,  $t(6)=2.724$  (g).  $P=0.0020$ ,  $t(6)=4.794$  (h). (i) Infiltrated cell numbers in the brain and spinal cord (*n*=7). Brain:  $P_{(Total)}=0.0028$ ,  $t(12)=3.747$ ,  $P_{(CD4)}=0.018$ ,  $t(12)=2.737$ ,  $P_{(Th17)}=0.0167$ ,  $t(12)=2.78$ ,  $P_{(Th1)}=0.0165$ ,  $t(12)=2.784$ ,  $P_{(CD8)}=0.0329$ ,  $t(12)=2.41$ ,  $P_{(B)}=0.0013$ ,  $t(12)=4.165$ ,  $P_{(DC)}=0.0003$ ,  $t(12)=5.008$ ,  $P_{(PMN)}=0.0004$ ,  $t(12)=4.912$ ,  $P_{(Mac)}=0.0027$ ,  $t(12)=3.759$ . Spinal cord:  $P_{(Total)}=0.0035$ ,  $t(12)=3.621$ ,  $P_{(CD4)}=0.0002$ ,  $t(12)=5.372$ ,  $P_{(Th17)}=0.0003$ ,  $t(12)=4.997$ ,  $P_{(Th1)}=0.00465$ ,  $t(12)=2.221$ ,  $P_{(CD8)}=0.0104$ ,  $t(12)=3.032$ ,  $P_{(B)}=0.0918$ ,  $t(12)=1.833$ ,  $P_{(DC)}=0.0429$ ,  $t(12)=2.263$ ,  $P_{(PMN)}=0.0011$ ,  $t(12)=4.29$ ,  $P_{(Mac)}=0.089$ ,  $t(12)=1.849$ . (j) Representative LFB-stained images of brains at 17-dpi. Red arrows indicate reduced LFB intensity, *i.e.*, reduced myelin. Scale bars, 200  $\mu$ m. (k) T2 FLAIR MRI analysis of spinal cords obtained from mice at 18-dpi. Yellow arrows indicate areas of potential myelin loss. (l) Thermal sensitivity evaluated by a hot-plate test in 9-dpi mice, which did not show any EAE symptoms and motor dysfunction. *n*=8.  $P_{(Naive\ vs\ Type-A)}=0.1524$ ,  $t(14)=1.514$ ,  $P_{(Naive\ vs\ Type-B)}=0.0013$ ,  $t(14)=4.026$ ,  $P_{(Type-A\ vs\ Type-B)}=0.0217$ ,  $t(14)=2.582$ . \*:  $p<0.05$ . All statistical analyses in this figure were performed by two-tailed unpaired Student's *t*-test. All the experimental data and images are representatives from at least 2 similar experiments for each.

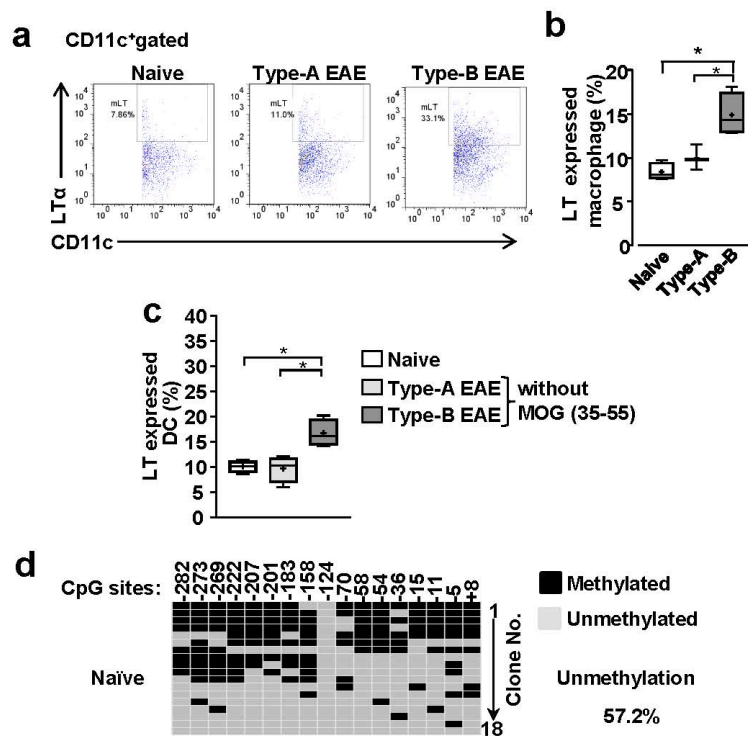

## Supplementary Figure 2

### mLT expression on DC.

(a) Flow charts showing mLT expression in DC (CD11c<sup>+</sup> gated) obtained from naïve mice, Type-A EAE mice, and Type-B EAE mice at 9-dpi. (b) Percentages of LTα<sup>+</sup> (i.e., mLT<sup>+</sup>) macrophages, determined by flow cytometry, in DLNs of naïve mice or mice with EAE at 9-dpi. Naïve (n=4), Type-A (n=3), Type-B (n=4).  $P_{(Naive\ vs\ Type-A)}=0.1340$ ,  $t(5)=1.7887$ ,  $P_{(Naive\ vs\ Type-B)}=0.0024$ ,  $t(6)=45.021$ ,  $P_{(Type-A\ vs\ Type-B)}=0.0268$ ,  $t(5)=3.101$ , by two-tailed unpaired Student's *t*-test. (c) Evaluating mLT expression on DCs from mice received CFA injection alone without MOG. One group received 200 µg *Mtb* in CFA (*Mtb* dosage for Type-A EAE), and another group had 400 µg *Mtb* in CFA twice (*Mtb* dosage for Type-B EAE). (n=6)  $P_{(Naive\ vs\ Type-A)}=0.07939$ ,  $t(6)=0.2732$ ,  $P_{(Naive\ vs\ Type-B)}=0.0040$ ,  $t(6)=4.519$ ,  $P_{(Type-A\ vs\ Type-B)}=0.0095$ ,  $t(6)=3.748$ , by two-tailed unpaired Student's *t*-test. (d) Methylation analysis was carried out by bisulfite conversion on the *Lta* promoter in DCs from naïve mice. Methylated and unmethylated CpG were shown with black and gray boxes, respectively

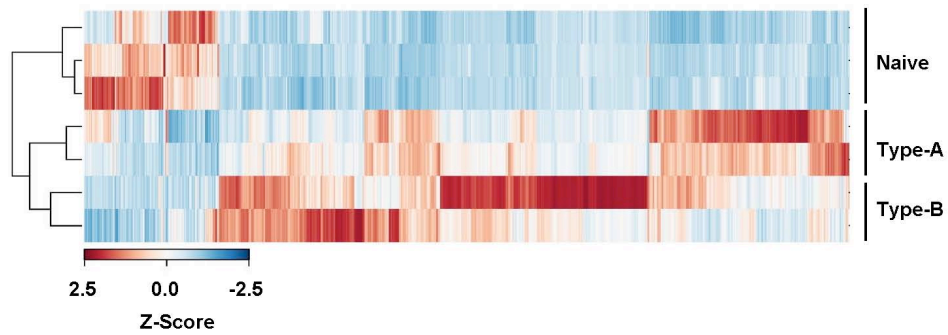

### Supplementary Figure 3

#### RNA-seq analysis.

Heatmap for differentially expressed genes in CD4<sup>+</sup> T cells isolated from naïve, Type-A EAE mice, and Type-B EAE mice at 9-dpi. Genes and samples have been clustered using correlation distance with complete linkage. A gene is listed on the heatmap if it had a p-value  $\leq 0.05$  and a  $\log_2FC > 1$  or  $< -1$ .

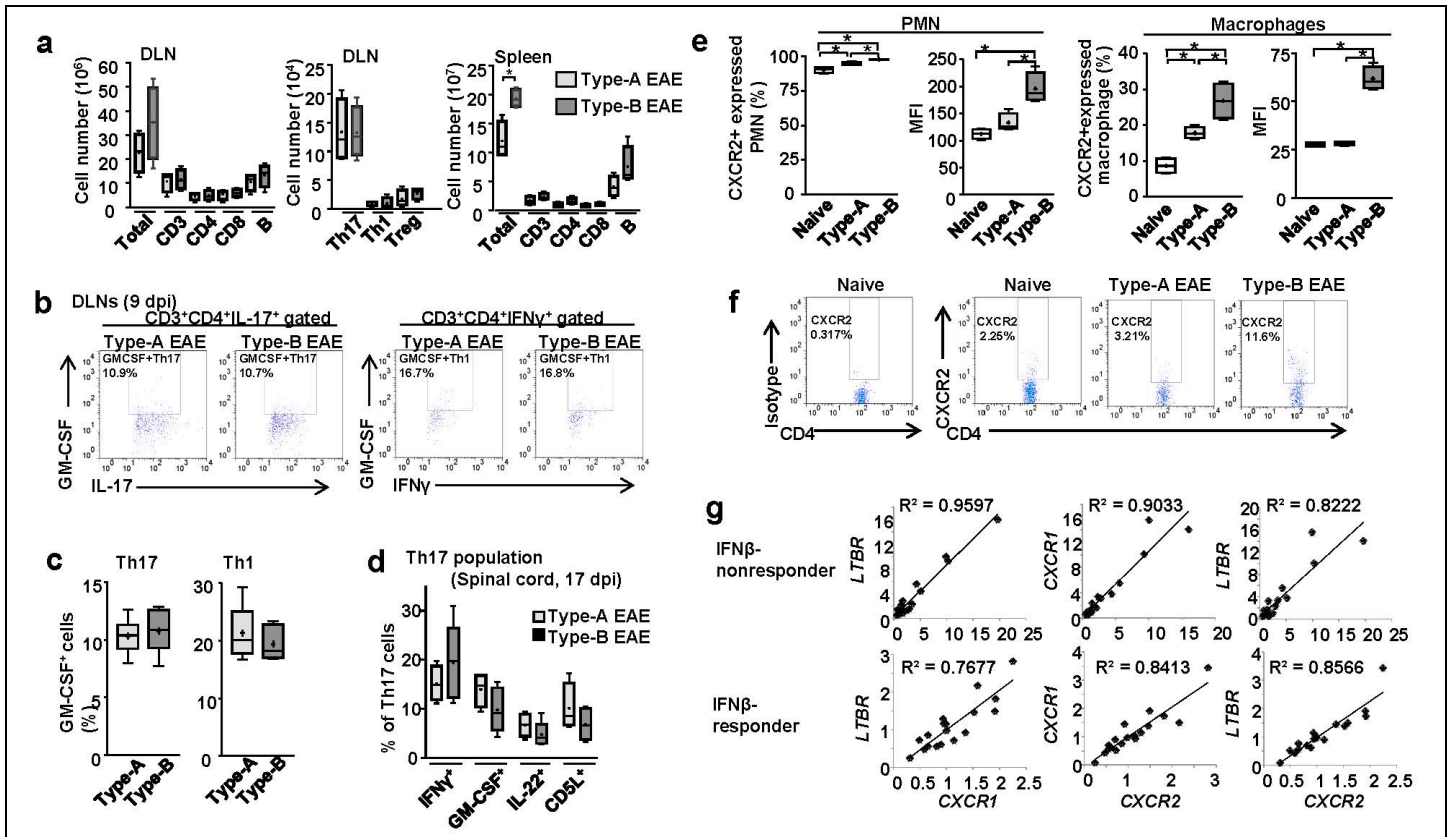

#### Supplementary Figure 4

#### Comparison of IFN $\beta$ -responders and non-responders in mouse EAE and human RRMS.

(a) Numbers of indicated cell types obtained from DLNs and spleen on 17-dpi were evaluated between Type-A and Type-B EAE.  $n=4$ . DLNs:  $P_{(Total)}=0.2073$ ,  $t(6)=1.413$ ,  $P_{(CD3)}=0.8466$ ,  $t(6)=0.202$ ,  $P_{(CD4)}=0.9285$ ,  $t(6)=0.09353$ ,  $P_{(CD8)}=0.7413$ ,  $t(6)=0.3459$ ,  $P_{(B)}=0.4141$ ,  $t(6)=0.8773$ ,  $P_{(Th17)}=0.9724$ ,  $t(6)=0.03605$ ,  $P_{(Th1)}=0.9017$ ,  $t(6)=0.1289$ ,  $P_{(Treg)}=0.3556$ ,  $t(6)=1.001$ . Spleen:  $P_{(Total)}=0.0072$ ,  $t(6)=3.99$ ,  $P_{(CD3)}=0.2537$ ,  $t(6)=1.262$ ,  $P_{(CD4)}=0.1781$ ,  $t(6)=1.525$ ,  $P_{(CD8)}=0.3999$ ,  $t(6)=0.906$ ,  $P_{(B)}=0.1371$ ,  $t(6)=1.715$ . (b, c) Representative flow charts (b) and proportion (c) for GM-CSF-producing Th1 and Th17 cells from Type-A and Type-B EAE at 9-dpi.  $n=6$ . Th17:  $P=0.6568$ ,  $t(10)=0.4579$ , Th1:  $P=0.3954$ ,  $t(10)=0.8879$ . (d) Proportion for IFN $\gamma$ <sup>-</sup>, GM-CSF<sup>-</sup>, IL-22<sup>-</sup> producing and CD5L<sup>-</sup> expressing Th17 cells in spinal cords from Type-A and Type-B EAE mice at 17-dpi. Type-A ( $n=4$ ), Type-B ( $n=5$ ).  $P_{(IFN\gamma)}=0.3493$ ,  $t(7)=1.0037$ ,  $P_{(GM-CSF)}=0.1760$ ,  $t(7)=1.505$ ,  $P_{(IL-22)}=0.2859$ ,  $t(7)=1.155$ ,  $P_{(CD5L)}=0.2641$ ,  $t(7)=1.214$ . (e) Proportions and MFI of CXCR2<sup>+</sup> neutrophils and macrophages obtained from naïve mice and mice with either Type-A or Type-B EAE at 9-dpi.  $n=4$ . PMN %:  $P_{(Naive vs Type-A)}=0.0102$ ,  $t(6)=3.695$ ,  $P_{(Naive vs Type-B)}=0.0004$ ,  $t(6)=7.001$ ,  $P_{(Type-A vs Type-B)}=0.0022$ ,  $t(6)=5.131$ . PMN MFI:  $P_{(Naive vs Type-A)}=0.0777$ ,  $t(6)=2.125$ ,  $P_{(Naive vs Type-B)}=0.0014$ ,  $t(6)=5.588$ ,  $P_{(Type-A vs Type-B)}=0.0090$ ,  $t(6)=3.81$ . Macrophage %:  $P_{(Naive vs Type-A)}=0.0005$ ,  $t(6)=6.774$ ,  $P_{(Naive vs Type-B)}=0.0006$ ,  $t(6)=6.48$ ,  $P_{(Type-A vs Type-B)}=0.0161$ ,  $t(6)=3.314$ . Macrophage MFI:  $P_{(Naive vs Type-A)}=0.33$ ,  $t(6)=1.06$ ,  $P_{(Naive vs Type-B)}=0.0001$ ,  $t(6)=11.11$ ,  $P_{(Type-A vs Type-B)}=0.0001$ ,  $t(6)=10.89$ . (f) Flow cytometry results showing CXCR2 protein expression on the CD4<sup>+</sup> T surface in each group (naïve mice, Type-A, or Type-B EAE mice at 9-dpi). (g) Comparison of relative gene expression levels between *Ltbr* and *Cxcr1*, *Cxcr1* and *Cxcr2*, *Ltbr* and *Cxcr2*, normalized to *Vcam1* expression. Total PBMCs from IFN $\beta$ -responder and non-responder RRMS patients were compared. All statistical analyses in this figure were performed by two-tailed unpaired Student's *t*-test. All the experimental data sets, except for (g), are representatives from at least 2 similar experiments for each.

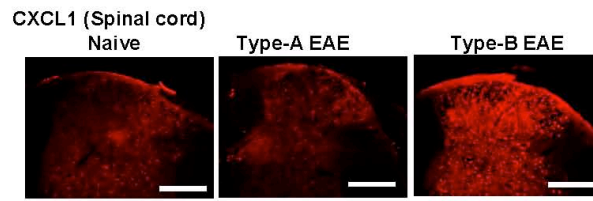

**Supplementary Figure 5**

**CXCL1 expression in spinal cords. .**

Shown are representative images of typical CXCL1 staining in spinal cords from naïve mice and mice with either Type-A or Type-B EAE at 9-dpi. Scale bars, 200  $\mu$ m. Images are representatives from 3 similar experiments.



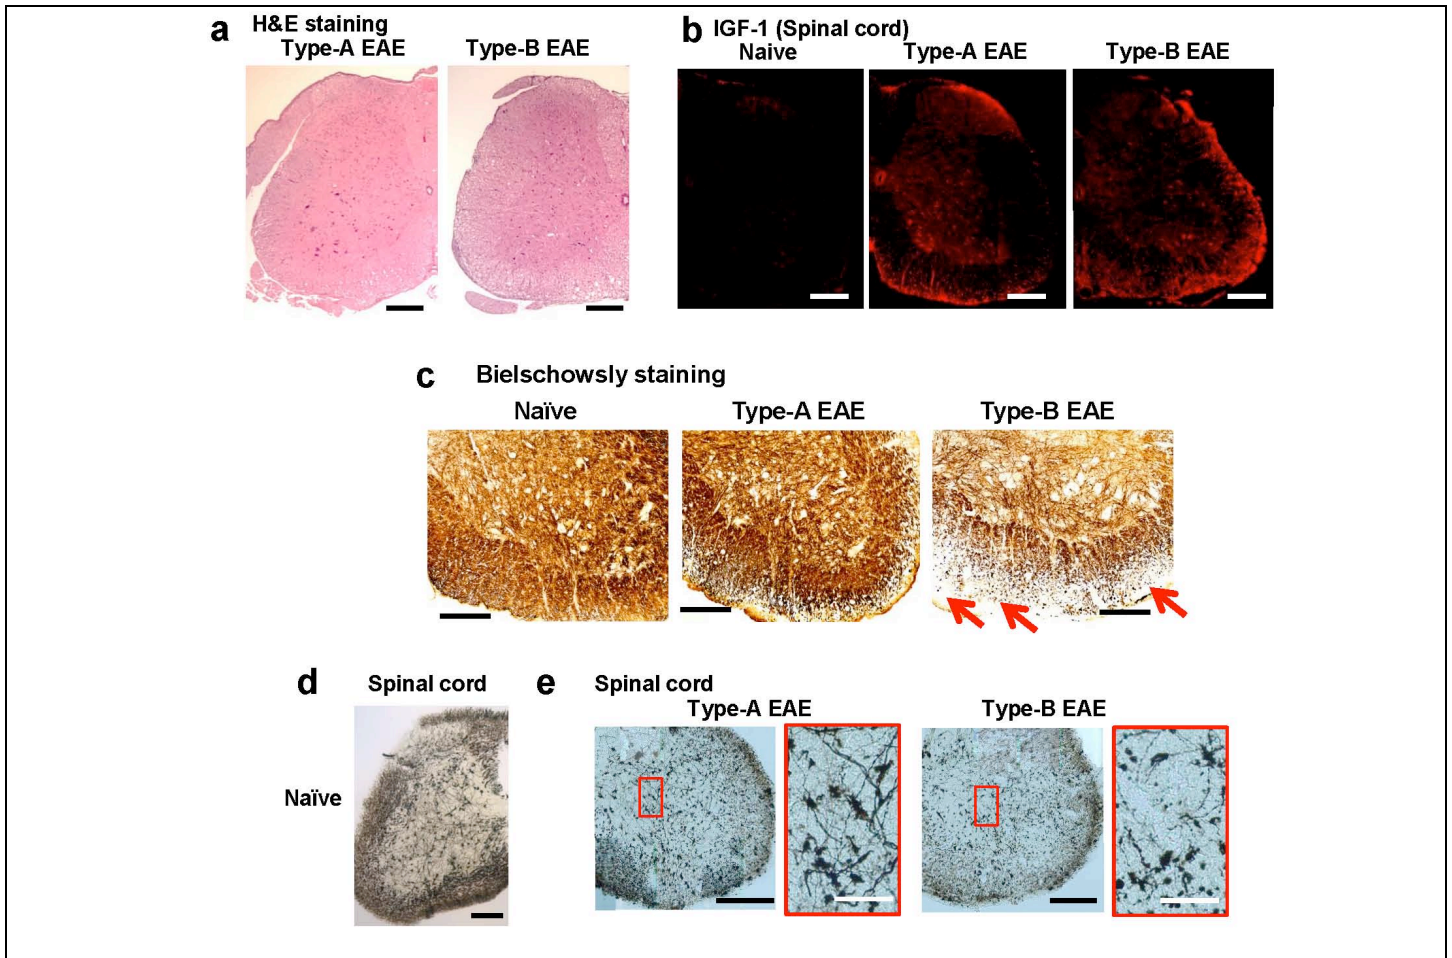

**Supplementary Figure 6**

**Histology of spinal cords in mice with Type-A or Type-B EAE.**

(a-e) Shown are representative images of typical staining from multiple mice. (a) H/E staining in the spinal cord of Type-A and Type-B EAE mice at 70-dpi. (b) IGF-1 staining in spinal cord of naïve mice and mice with either Type-A or Type-B EAE at 22-dpi. (c) Bielschowsky neuron staining in spinal cords of naïve mice (e), and Type-A and Type-B EAE at 30-dpi. Red arrows indicate area showing reduced staining intensity in the spinal cord. (d,e) Golgi's silver staining in spinal cord of naïve mice (d), and Type-A and Type-B at 22-dpi (e). All scale bars in this figure except magnified figure in (e), 200 µm. All scale bars in magnified figure in (e), 50 µm. All images are representatives from 3 similar experiments.

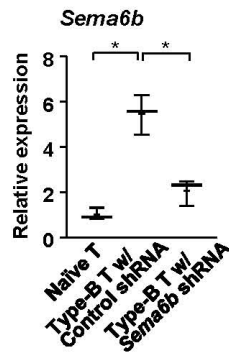

#### Supplementary Figure 7

##### **Sema6b** shRNA knock-down in T cells. .

*Sema6b* expression levels in CD4<sup>+</sup> T cells isolated from naïve or Type-B EAE mice at 9-dpi were evaluated by qPCR. *Sema6b* was knocked down by shRNA in the indicated group of CD4<sup>+</sup> T cells. Control shRNA (scrambled shRNA sequence) was used for the control group. Values shown are obtained from three independent trials using one mouse per each.  $n=3$ .  $P_{(Naïve\ T\ vs\ Type-B\ T+Control\ shRNA)}=0.0011$ ,  $t(4)=8.396$ ,  $P_{(Type-B\ T+Control\ shRNA\ vs\ Type-B\ T+Sema6b\ shRNA)}=0.0051$ ,  $t(4)=5.559$ . \*:  $p<0.05$ .

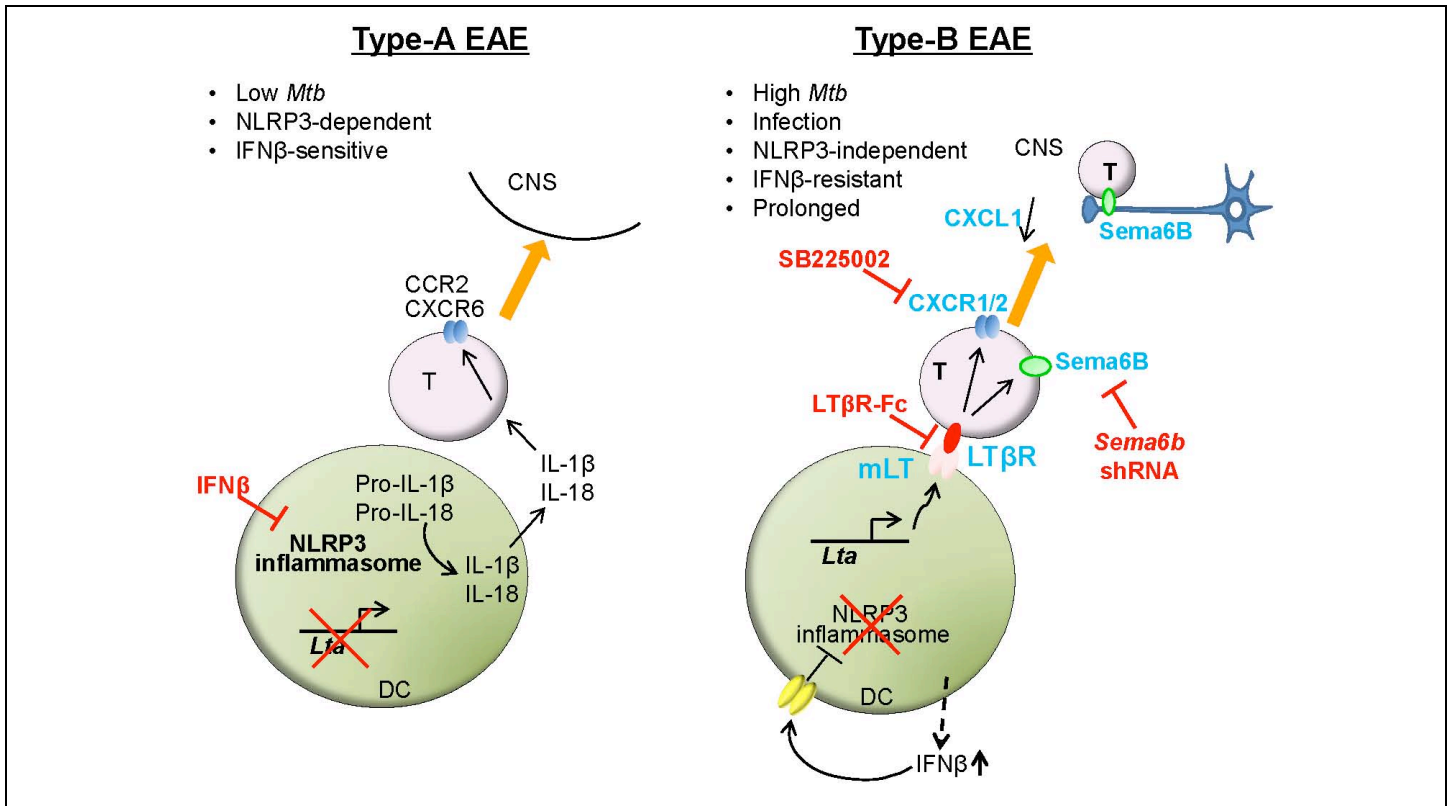

**Supplementary Figure 8**

**Schematic diagram of distinct pathology between two EAE subtypes. .**

Type-A EAE is NLRP3 inflammasome-dependent and IFN $\beta$ -sensitive. Type-B EAE is induced by immunization with higher doses of *Mtb* than Type-A EAE induction, and is NLRP3 inflammasome-independent and IFN $\beta$ -resistant. Type-B EAE can also be induced with Type-A EAE induction methods with MHV68 infection or with rLT (rLT $\alpha$ 2 $\beta$ 1) injection. In Type-B EAE, *Lta* gene expression is epigenetically induced in DCs and the expression of membrane-bound LT (mLT) on DCs are enhanced. mLT stimulate LT $\beta$ R on CD4<sup>+</sup> T cells, resulting in the upregulation of CXCR2 on CD4<sup>+</sup> T cells. Blockade of LT $\beta$ R (with LT $\beta$ R-Fc) and CXCR2 (with SB225002) selectively inhibits the Type-B EAE progression. mLT is also involved in the induction of Sema6B in T cells. Sema6B causes neural damages, and this may be a reason for the prolonged and minimal remission in Type-B EAE.
