# Supplementary material
Source: PubMed Central journal article supplement (PMC5482232)
Supplement: NIHMS858939-supplement-Supplemental_Methods_Checklist.pdf [file NIHMS858939-supplement-Supplemental_Methods_Checklist.pdf]

Corresponding Author: Mari L. Shinohara

Manuscript Number: NN-A55184B

Manuscript Type: Article

# Main Figures: 7

# Supplementary Figures: 8

# Supplementary Tables: 4

# Supplementary Videos: 2

## Reporting Checklist for Nature Neuroscience

This checklist is used to ensure good reporting standards and to improve the reproducibility of published results. For more information, please read [Reporting Life Sciences Research](#).

Please note that in the event of publication, it is mandatory that authors include all relevant methodological and statistical information in the manuscript.

### ► Statistics reporting, by figure

- Please specify the following information for each panel reporting quantitative data, and where each item is reported (section, e.g. Results, & paragraph number).
- Each figure legend should ideally contain an exact sample size (n) for each experimental group/condition, where n is an exact number and not a range, a clear definition of how n is defined (for example x cells from x slices from x animals from x litters, collected over x days), a description of the statistical test used, the results of the tests, any descriptive statistics and clearly defined error bars if applicable.
- For any experiments using custom statistics, please indicate the test used and stats obtained for each experiment.
- Each figure legend should include a statement of how many times the experiment shown was replicated in the lab; the details of sample collection should be sufficiently clear so that the replicability of the experiment is obvious to the reader.
- For experiments reported in the text but not in the figures, please use the paragraph number instead of the figure number.

**Note:** Mean and standard deviation are not appropriate on small samples, and plotting independent data points is usually more informative. When technical replicates are reported, error and significance measures reflect the experimental variability and not the variability of the biological process; it is misleading not to state this clearly.

| FIGURE NUMBER           | TEST USED       |                       | n            |                                    |                       | DESCRIPTIVE STATS (AVERAGE, VARIANCE) |                       | P VALUE     |                       | DEGREES OF FREEDOM & F/t/z/R/ETC VALUE |                       |
|-------------------------|-----------------|-----------------------|--------------|------------------------------------|-----------------------|---------------------------------------|-----------------------|-------------|-----------------------|----------------------------------------|-----------------------|
|                         | WHICH TEST?     | SECTION & PARAGRAPH # | EXACT VALUE  | DEFINED?                           | SECTION & PARAGRAPH # | REPORTED?                             | SECTION & PARAGRAPH # | EXACT VALUE | SECTION & PARAGRAPH # | VALUE                                  | SECTION & PARAGRAPH # |
| example 1a              | one-way ANOVA   | Fig. legend           | 9, 9, 10, 15 | mice from at least 3 litters/group | Methods para 8        | error bars are mean +/- SEM           | Fig. legend           | p = 0.044   | Fig. legend           | F(3, 36) = 2.97                        | Fig. legend           |
| example results, para 6 | unpaired t-test | Results para 6        | 15           | slices from 10 mice                | Results para 6        | error bars are mean +/- SEM           | Results para 6        | p = 0.0006  | Results para 6        | t(28) = 2.808                          | Results para 6        |

|               |                         | TEST USED             |             | n        |                                    |                  | DESCRIPTIVE STATS (AVERAGE, VARIANCE)               |             | P VALUE               |                           | DEGREES OF FREEDOM & F/t/z/R/ETC VALUE |              |                     |
|---------------|-------------------------|-----------------------|-------------|----------|------------------------------------|------------------|-----------------------------------------------------|-------------|-----------------------|---------------------------|----------------------------------------|--------------|---------------------|
| FIGURE NUMBER | WHICH TEST?             | SECTION & PARAGRAPH # | EXACT VALUE | DEFINED? | SECTION & PARAGRAPH #              | REPORTED?        | SECTION & PARAGRAPH #                               | EXACT VALUE | SECTION & PARAGRAPH # | VALUE                     | SECTION & PARAGRAPH #                  |              |                     |
| +<br>-        | 1a<br>Type<br>-A        | unpaired t-test       | Fig. legend | 5,5      | mice from at least 2 litters/group | Methods "animal" | maximum and minimum are at the ends of the whiskers | Fig. legend | Fig. legend           | P(WT vs Nlrp3-/-) <0.0001 | Fig. legend                            | t(8)=12.78   | Methods "Statistic" |
| +<br>-        | 1a<br>Type<br>-A<br>EAE | unpaired t-test       | Fig. legend | 5,5      | mice from at least 2 litters/group | Methods "animal" | maximum and minimum are at the ends of the whiskers | Fig. legend | Fig. legend           | P(WT vs Asc-/-) <0.0001   | Fig. legend                            | t(8)=10.57   | Methods "Statistic" |
| +<br>-        | 1a<br>Type<br>-B<br>EAE | unpaired t-test       | Fig. legend | 5,5      | mice from at least 2 litters/group | Methods "animal" | maximum and minimum are at the ends of the whiskers | Fig. legend | Fig. legend           | P(WT vs Nlrp3-/-)=0.7236  | Fig. legend                            | t(8)=0.3634, | Methods "Statistic" |
| +<br>-        | 1a<br>Type<br>-B<br>EAE | unpaired t-test       | Fig. legend | 5,5      | mice from at least 2 litters/group | Methods "animal" | maximum and minimum are at the ends of the whiskers | Fig. legend | Fig. legend           | P(WT vs Asc-/-)=0.6869    | Fig. legend                            | t(8)=0.4181. | Methods "Statistic" |
| +<br>-        | 1b<br>brain             | unpaired t-test       | Fig. legend | 4,4      | mice from at least 2 litters/group | Methods "animal" | maximum and minimum are at the ends of the whiskers | Fig. legend | Fig. legend           | P(WT vs Nlrp3-/-)=0.4507  | Fig. legend                            | t(6)=0.8065  | Methods "Statistic" |
| +<br>-        | 1b<br>brain             | unpaired t-test       | Fig. legend | 4,4      | mice from at least 2 litters/group | Methods "animal" | maximum and minimum are at the ends of the whiskers | Fig. legend | Fig. legend           | P(WT vs Asc-/-)=0.4256    | Fig. legend                            | t(6)=0.85456 | Methods "Statistic" |
| +<br>-        | 1b<br>Spinal<br>cord    | unpaired t-test       | Fig. legend | 4,4      | mice from at least 2 litters/group | Methods "animal" | maximum and minimum are at the ends of the whiskers | Fig. legend | Fig. legend           | P(WT vs Nlrp3-/-)=0.2260  | Fig. legend                            | t(6)=1.349   | Methods "Statistic" |
| +<br>-        | 1b<br>Spinal<br>cord    | unpaired t-test       | Fig. legend | 4,4      | mice from at least 2 litters/group | Methods "animal" | maximum and minimum are at the ends of the whiskers | Fig. legend | Fig. legend           | P(WT vs Asc-/-)=0.6887    | Fig. legend                            | t(6)=0.4206  | Methods "Statistic" |
| +<br>-        | 1b<br>brain             | unpaired t-test       | Fig. legend | 4,4      | mice from at least 2 litters/group | Methods "animal" | maximum and minimum are at the ends of the whiskers | Fig. legend | Fig. legend           | P(WT vs Nlrp3-/-)=0.6880  | Fig. legend                            | t(6)=0.4216  | Methods "Statistic" |
| +<br>-        | 1b<br>brain             | unpaired t-test       | Fig. legend | 4,4      | mice from at least 2 litters/group | Methods "animal" | maximum and minimum are at the ends of the whiskers | Fig. legend | Fig. legend           | P(WT vs Asc-/-)=0.6953    | Fig. legend                            | t(6)=0.4111  | Methods "Statistic" |
| +<br>-        | 1b<br>Spinal<br>cord    | unpaired t-test       | Fig. legend | 4,4      | mice from at least 2 litters/group | Methods "animal" | maximum and minimum are at the ends of the whiskers | Fig. legend | Fig. legend           | P(WT vs Nlrp3-/-)=0.4683  | Fig. legend                            | t(6)=0.77416 | Methods "Statistic" |
| +<br>-        | 1b<br>Spinal<br>cord    | unpaired t-test       | Fig. legend | 4,4      | mice from at least 2 litters/group | Methods "animal" | maximum and minimum are at the ends of the whiskers | Fig. legend | Fig. legend           | P(WT vs Asc-/-)=0.6429    | Fig. legend                            | t(6)=0.4879  | Methods "Statistic" |
| +<br>-        | 1d<br>Type<br>-A        | unpaired t-test       | Fig. legend | 5,5      | mice from at least 2 litters/group | Methods "animal" | maximum and minimum are at the ends of the whiskers | Fig. legend | Fig. legend           | P(Type-A)=0.0002          | Fig. legend                            | t(5)=6.668   | Methods "Statistic" |
| +<br>-        | 1d<br>Type<br>-B        | unpaired t-test       | Fig. legend | 5,5      | mice from at least 2 litters/group | Methods "animal" | maximum and minimum are at the ends of the whiskers | Fig. legend | Fig. legend           | P(Type-B)=0.6514          | Fig. legend                            | t(6)=0.4753  | Methods "Statistic" |

|   |   |             |                 |             |     |                                    |                  |                                                     |             |                            |             |              |                     |
|---|---|-------------|-----------------|-------------|-----|------------------------------------|------------------|-----------------------------------------------------|-------------|----------------------------|-------------|--------------|---------------------|
| + | - | 1e<br>IL-1b | unpaired t-test | Fig. legend | 8,7 | mice from at least 2 litters/group | Methods "animal" | maximum and minimum are at the ends of the whiskers | Fig. legend | P(Naive vs Type-A)=0.0327  | Fig. legend | t(13)=2.389  | Methods "Statistic" |
| + | - | 1e<br>IL-1b | unpaired t-test | Fig. legend | 8,8 | mice from at least 2 litters/group | Methods "animal" | maximum and minimum are at the ends of the whiskers | Fig. legend | P(Naive vs Type-B)=0.1697  | Fig. legend | t(14)=1.448  | Methods "Statistic" |
| + | - | 1e<br>IL-1b | unpaired t-test | Fig. legend | 7,8 | mice from at least 2 litters/group | Methods "animal" | maximum and minimum are at the ends of the whiskers | Fig. legend | P(Type-A vs Type-B)=0.0284 | Fig. legend | t(13)=2.4912 | Methods "Statistic" |
| + | - | 1e<br>IFNb  | unpaired t-test | Fig. legend | 7,7 | mice from at least 2 litters/group | Methods "animal" | maximum and minimum are at the ends of the whiskers | Fig. legend | P(Naive vs Type-A)=0.7024  | Fig. legend | t(12)=0.3914 | Methods "Statistic" |
| + | - | 1e<br>IFNb  | unpaired t-test | Fig. legend | 7,7 | mice from at least 2 litters/group | Methods "animal" | maximum and minimum are at the ends of the whiskers | Fig. legend | P(Naive vs Type-B)=0.0339  | Fig. legend | t(12)=2.393  | Methods "Statistic" |
| + | - | 1e<br>IFNb  | unpaired t-test | Fig. legend | 7,7 | mice from at least 2 litters/group | Methods "animal" | maximum and minimum are at the ends of the whiskers | Fig. legend | P(Type-A vs Type-B)=0.0409 | Fig. legend | t(12)=2.29   | Methods "Statistic" |
| + | - | 1h          | unpaired t-test | Fig. legend | 7,7 | mice from at least 2 litters/group | Methods "animal" | maximum and minimum are at the ends of the whiskers | Fig. legend | P(Total)=0.0166            | Fig. legend | t(12)=2.78   | Methods "Statistic" |
| + | - | 1h          | unpaired t-test | Fig. legend | 7,7 | mice from at least 2 litters/group | Methods "animal" | maximum and minimum are at the ends of the whiskers | Fig. legend | P(CD4)<0.0074              | Fig. legend | t(12)=3.216  | Methods "Statistic" |
| + | - | 1h          | unpaired t-test | Fig. legend | 7,7 | mice from at least 2 litters/group | Methods "animal" | maximum and minimum are at the ends of the whiskers | Fig. legend | P(Th17)=0.049              | Fig. legend | t(12)=3.436  | Methods "Statistic" |
| + | - | 1h          | unpaired t-test | Fig. legend | 7,7 | mice from at least 2 litters/group | Methods "animal" | maximum and minimum are at the ends of the whiskers | Fig. legend | P(Th1)=0.0193              | Fig. legend | t(12)=2.701  | Methods "Statistic" |
| + | - | 1h          | unpaired t-test | Fig. legend | 7,7 | mice from at least 2 litters/group | Methods "animal" | maximum and minimum are at the ends of the whiskers | Fig. legend | P(CD8)=0.098               | Fig. legend | t(12)=3.067  | Methods "Statistic" |
| + | - | 1h          | unpaired t-test | Fig. legend | 7,7 | mice from at least 2 litters/group | Methods "animal" | maximum and minimum are at the ends of the whiskers | Fig. legend | P(B)=0.0062                | Fig. legend | t(12)=3.311  | Methods "Statistic" |
| + | - | 1h          | unpaired t-test | Fig. legend | 7,7 | mice from at least 2 litters/group | Methods "animal" | maximum and minimum are at the ends of the whiskers | Fig. legend | P(DC)=0.0049               | Fig. legend | t(12)=3.436  | Methods "Statistic" |
| + | - | 1h          | unpaired t-test | Fig. legend | 7,7 | mice from at least 2 litters/group | Methods "animal" | maximum and minimum are at the ends of the whiskers | Fig. legend | P(PMN)=0.0051              | Fig. legend | t(12)=3.413  | Methods "Statistic" |
| + | - | 1h          | unpaired t-test | Fig. legend | 7,7 | mice from at least 2 litters/group | Methods "animal" | maximum and minimum are at the ends of the whiskers | Fig. legend | P(Mac)=0.0112              | Fig. legend | t(12)=2.992  | Methods "Statistic" |
| + | - | 2a          | unpaired t-test | Fig. legend | 3,3 | mice from at least 2 litters/group | Methods "animal" | maximum and minimum are at the ends of the whiskers | Fig. legend | P(Naive vs Type-A)=0.2646  | Fig. legend | t(4)=1.296   | Methods "Statistic" |

|   |   |    |                 |             |     |                                    |                  |                                                     |             |                            |             |             |                     |
|---|---|----|-----------------|-------------|-----|------------------------------------|------------------|-----------------------------------------------------|-------------|----------------------------|-------------|-------------|---------------------|
| + | - | 2a | unpaired t-test | Fig. legend | 3,3 | mice from at least 2 litters/group | Methods "animal" | maximum and minimum are at the ends of the whiskers | Fig. legend | P(Naive vs Type-B)=0.0042  | Fig. legend | t(4)=5.88   | Methods "Statistic" |
| + | - | 2a | unpaired t-test | Fig. legend | 3,3 | mice from at least 2 litters/group | Methods "animal" | maximum and minimum are at the ends of the whiskers | Fig. legend | P(Type-A vs Type-B)=0.0027 | Fig. legend | t(4)=6.61   | Methods "Statistic" |
| + | - | 2b | unpaired t-test | Fig. legend | 3,3 | mice from at least 2 litters/group | Methods "animal" | maximum and minimum are at the ends of the whiskers | Fig. legend | P(Naive vs Type-A)=0.0253  | Fig. legend | t(6)=2.96   | Methods "Statistic" |
| + | - | 2b | unpaired t-test | Fig. legend | 3,3 | mice from at least 2 litters/group | Methods "animal" | maximum and minimum are at the ends of the whiskers | Fig. legend | P(Naive vs Type-B)=0.0109  | Fig. legend | t(6)=3.637  | Methods "Statistic" |
| + | - | 2b | unpaired t-test | Fig. legend | 3,3 | mice from at least 2 litters/group | Methods "animal" | maximum and minimum are at the ends of the whiskers | Fig. legend | P(Type-A vs Type-B)=0.0277 | Fig. legend | t(6)=2.891  | Methods "Statistic" |
| + | - | 2g | unpaired t-test | Fig. legend | 6,7 | mice from at least 2 litters/group | Methods "animal" | maximum and minimum are at the ends of the whiskers | Fig. legend | P(Total)=0.0082            | Fig. legend | t(11)=3.22  | Methods "Statistic" |
| + | - | 2g | unpaired t-test | Fig. legend | 6,7 | mice from at least 2 litters/group | Methods "animal" | maximum and minimum are at the ends of the whiskers | Fig. legend | P(CD4)=0.0024              | Fig. legend | t(11)=3.909 | Methods "Statistic" |
| + | - | 2g | unpaired t-test | Fig. legend | 6,7 | mice from at least 2 litters/group | Methods "animal" | maximum and minimum are at the ends of the whiskers | Fig. legend | P(Th17)=0.0131             | Fig. legend | t(11)=2.953 | Methods "Statistic" |
| + | - | 2g | unpaired t-test | Fig. legend | 6,7 | mice from at least 2 litters/group | Methods "animal" | maximum and minimum are at the ends of the whiskers | Fig. legend | P(Th1)=0.0109              | Fig. legend | t(11)=3.058 | Methods "Statistic" |
| + | - | 2g | unpaired t-test | Fig. legend | 6,7 | mice from at least 2 litters/group | Methods "animal" | maximum and minimum are at the ends of the whiskers | Fig. legend | P(CD8)=0.0480              | Fig. legend | t(11)=2.225 | Methods "Statistic" |
| + | - | 2g | unpaired t-test | Fig. legend | 6,7 | mice from at least 2 litters/group | Methods "animal" | maximum and minimum are at the ends of the whiskers | Fig. legend | P(B)=0.1762                | Fig. legend | t(11)=1.445 | Methods "Statistic" |
| + | - | 2g | unpaired t-test | Fig. legend | 6,7 | mice from at least 2 litters/group | Methods "animal" | maximum and minimum are at the ends of the whiskers | Fig. legend | P(DC)=0.1020               | Fig. legend | t(11)=1.784 | Methods "Statistic" |
| + | - | 2g | unpaired t-test | Fig. legend | 6,7 | mice from at least 2 litters/group | Methods "animal" | maximum and minimum are at the ends of the whiskers | Fig. legend | P(PMN)=0.3260              | Fig. legend | t(11)=1.027 | Methods "Statistic" |
| + | - | 2g | unpaired t-test | Fig. legend | 6,7 | mice from at least 2 litters/group | Methods "animal" | maximum and minimum are at the ends of the whiskers | Fig. legend | P(Mac)=0.1737              | Fig. legend | t(11)=1.455 | Methods "Statistic" |
| + | - | 2h | unpaired t-test | Fig. legend | 3,3 | mice from at least 2 litters/group | Methods "animal" | maximum and minimum are at the ends of the whiskers | Fig. legend | P(rIFN $\gamma$ )=0.8433   | Fig. legend | t(4)=0.2108 | Methods "Statistic" |
| + | - | 2h | unpaired t-test | Fig. legend | 3,3 | mice from at least 2 litters/group | Methods "animal" | maximum and minimum are at the ends of the whiskers | Fig. legend | P(rIL-17)=0.0295           | Fig. legend | t(4)=3.317  | Methods "Statistic" |

|        |             |                 |             |     |                                    |                  |                                                     |             |                            |             |             |                     |
|--------|-------------|-----------------|-------------|-----|------------------------------------|------------------|-----------------------------------------------------|-------------|----------------------------|-------------|-------------|---------------------|
| +<br>- | 3d<br>Cxcr2 | unpaired t-test | Fig. legend | 3,3 | mice from at least 2 litters/group | Methods "animal" | maximum and minimum are at the ends of the whiskers | Fig. legend | P(Naive vs Type-A)=0.0231  | Fig. legend | t(4)=3.583  | Methods "Statistic" |
| +<br>- | 3d<br>Cxcr2 | unpaired t-test | Fig. legend | 3,3 | mice from at least 2 litters/group | Methods "animal" | maximum and minimum are at the ends of the whiskers | Fig. legend | P(Naive vs Type-B)<0.0001  | Fig. legend | t(4)=23.22  | Methods "Statistic" |
| +<br>- | 3d<br>Cxcr2 | unpaired t-test | Fig. legend | 3,3 | mice from at least 2 litters/group | Methods "animal" | maximum and minimum are at the ends of the whiskers | Fig. legend | P(Type-A vs Type-B)<0.0001 | Fig. legend | t(4)=22.75  | Methods "Statistic" |
| +<br>- | 3d<br>Cxcr1 | unpaired t-test | Fig. legend | 3,3 | mice from at least 2 litters/group | Methods "animal" | maximum and minimum are at the ends of the whiskers | Fig. legend | P(Naive vs Type-A)=0.5999  | Fig. legend | t(4)=0.5689 | Methods "Statistic" |
| +<br>- | 3d<br>Cxcr1 | unpaired t-test | Fig. legend | 3,3 | mice from at least 2 litters/group | Methods "animal" | maximum and minimum are at the ends of the whiskers | Fig. legend | P(Naive vs Type-B)=0.0015  | Fig. legend | t(4)=7.806  | Methods "Statistic" |
| +<br>- | 3d<br>Cxcr1 | unpaired t-test | Fig. legend | 3,3 | mice from at least 2 litters/group | Methods "animal" | maximum and minimum are at the ends of the whiskers | Fig. legend | P(Type-A vs Type-B)=0.0036 | Fig. legend | t(4)=6.119  | Methods "Statistic" |
| +<br>- | 3d<br>Ltbr  | unpaired t-test | Fig. legend | 3,3 | mice from at least 2 litters/group | Methods "animal" | error bars are mean +/- SEM<br>are mean +/- SEM     | Fig. legend | P(Naive vs Type-A)=0.0170  | Fig. legend | t(4)=3.937  | Methods "Statistic" |
| +<br>- | 3d<br>Ltbr  | unpaired t-test | Fig. legend | 3,3 | mice from at least 2 litters/group | Methods "animal" | maximum and minimum are at the ends of the whiskers | Fig. legend | P(Naive vs Type-B)=0.0091  | Fig. legend | t(4)=4.733  | Methods "Statistic" |
| +<br>- | 3d<br>Ltbr  | unpaired t-test | Fig. legend | 3,3 | mice from at least 2 litters/group | Methods "animal" | maximum and minimum are at the ends of the whiskers | Fig. legend | P(Type-A vs Type-B)=0.0333 | Fig. legend | t(4)=3.188  | Methods "Statistic" |
| +<br>- | 3e          | unpaired t-test | Fig. legend | 3,3 | mice from at least 2 litters/group | Methods "animal" | maximum and minimum are at the ends of the whiskers | Fig. legend | P(Cxcr2)<0.0001            | Fig. legend | t(4)=19.36  | Methods "Statistic" |
| +<br>- | 3e          | unpaired t-test | Fig. legend | 3,3 | mice from at least 2 litters/group | Methods "animal" | maximum and minimum are at the ends of the whiskers | Fig. legend | P(Cxcr1)<0.0001            | Fig. legend | t(4)=16.09  | Methods "Statistic" |
| +<br>- | 3e          | unpaired t-test | Fig. legend | 3,3 | mice from at least 2 litters/group | Methods "animal" | maximum and minimum are at the ends of the whiskers | Fig. legend | P(Ltbr)=0.0116             | Fig. legend | t(4)=4.413  | Methods "Statistic" |
| +<br>- | 4a<br>DLNs  | unpaired t-test | Fig. legend | 4,4 | mice from at least 2 litters/group | Methods "animal" | maximum and minimum are at the ends of the whiskers | Fig. legend | P(Total)=0.0314            | Fig. legend | t(6)=2.795  | Methods "Statistic" |
| +<br>- | 4a<br>DLNs  | unpaired t-test | Fig. legend | 4,4 | mice from at least 2 litters/group | Methods "animal" | maximum and minimum are at the ends of the whiskers | Fig. legend | P(CD4)=0.8376              | Fig. legend | t(6)=0.2141 | Methods "Statistic" |
| +<br>- | 4a<br>DLNs  | unpaired t-test | Fig. legend | 4,4 | mice from at least 2 litters/group | Methods "animal" | maximum and minimum are at the ends of the whiskers | Fig. legend | P(CD8)=0.2798              | Fig. legend | t(6)=1.188  | Methods "Statistic" |
| +<br>- | 4a<br>DLNs  | unpaired t-test | Fig. legend | 4,4 | mice from at least 2 litters/group | Methods "animal" | maximum and minimum are at the ends of the whiskers | Fig. legend | P(B)=0.0078                | Fig. legend | t(6)=3.921  | Methods "Statistic" |

|        |              |                 |             |     |                                    |                  |                                                     |             |                            |             |              |                     |
|--------|--------------|-----------------|-------------|-----|------------------------------------|------------------|-----------------------------------------------------|-------------|----------------------------|-------------|--------------|---------------------|
| +<br>- | 4a<br>DLNs   | unpaired t-test | Fig. legend | 4,4 | mice from at least 2 litters/group | Methods "animal" | maximum and minimum are at the ends of the whiskers | Fig. legend | P(DC)=0.9606               | Fig. legend | t(6)=0.05144 | Methods "Statistic" |
| +<br>- | 4a<br>DLNs   | unpaired t-test | Fig. legend | 4,4 | mice from at least 2 litters/group | Methods "animal" | maximum and minimum are at the ends of the whiskers | Fig. legend | P(Mac)=0.0469              | Fig. legend | t(6)=2.495   | Methods "Statistic" |
| +<br>- | 4a<br>DLNs   | unpaired t-test | Fig. legend | 4,4 | mice from at least 2 litters/group | Methods "animal" | maximum and minimum are at the ends of the whiskers | Fig. legend | P(PMN)=0.1138              | Fig. legend | t(6)=1.851   | Methods "Statistic" |
| +<br>- | 4a<br>DLNs   | unpaired t-test | Fig. legend | 4,4 | mice from at least 2 litters/group | Methods "animal" | maximum and minimum are at the ends of the whiskers | Fig. legend | P(Th17)=0.5671             | Fig. legend | t(6)=0.6053  | Methods "Statistic" |
| +<br>- | 4a<br>DLNs   | unpaired t-test | Fig. legend | 4,4 | mice from at least 2 litters/group | Methods "animal" | maximum and minimum are at the ends of the whiskers | Fig. legend | P(Th1)=0.4813              | Fig. legend | t(6)=0.7506  | Methods "Statistic" |
| +<br>- | 4a<br>DLNs   | unpaired t-test | Fig. legend | 4,4 | mice from at least 2 litters/group | Methods "animal" | maximum and minimum are at the ends of the whiskers | Fig. legend | P(Treg)=0.9888             | Fig. legend | t(6)=0.01458 | Methods "Statistic" |
| +<br>- | 4a<br>Spleen | unpaired t-test | Fig. legend | 4,4 | mice from at least 2 litters/group | Methods "animal" | maximum and minimum are at the ends of the whiskers | Fig. legend | P(Total)=0.0307            | Fig. legend | t(6)=2.813   | Methods "Statistic" |
| +<br>- | 4a<br>Spleen | unpaired t-test | Fig. legend | 4,4 | mice from at least 2 litters/group | Methods "animal" | maximum and minimum are at the ends of the whiskers | Fig. legend | P(CD4)=0.7759              | Fig. legend | t(6)=0.2978  | Methods "Statistic" |
| +<br>- | 4a<br>Spleen | unpaired t-test | Fig. legend | 4,4 | mice from at least 2 litters/group | Methods "animal" | maximum and minimum are at the ends of the whiskers | Fig. legend | P(CD8)=0.0729              | Fig. legend | t(6)=0.4435  | Methods "Statistic" |
| +<br>- | 4a<br>Spleen | unpaired t-test | Fig. legend | 4,4 | mice from at least 2 litters/group | Methods "animal" | maximum and minimum are at the ends of the whiskers | Fig. legend | P(B)=0.0046                | Fig. legend | t(6)=4.403   | Methods "Statistic" |
| +<br>- | 4a<br>Spleen | unpaired t-test | Fig. legend | 4,4 | mice from at least 2 litters/group | Methods "animal" | maximum and minimum are at the ends of the whiskers | Fig. legend | P(DC)=0.2555               | Fig. legend | t(6)=1.326   | Methods "Statistic" |
| +<br>- | 4a<br>Spleen | unpaired t-test | Fig. legend | 4,4 | mice from at least 2 litters/group | Methods "animal" | maximum and minimum are at the ends of the whiskers | Fig. legend | P(Mac)=0.0540              | Fig. legend | t(6)=2.703   | Methods "Statistic" |
| +<br>- | 4a<br>Spleen | unpaired t-test | Fig. legend | 4,4 | mice from at least 2 litters/group | Methods "animal" | maximum and minimum are at the ends of the whiskers | Fig. legend | P(PMN)=0.0104              | Fig. legend | t(6)=3.673   | Methods "Statistic" |
| +<br>- | 4b %         | unpaired t-test | Fig. legend | 4,4 | mice from at least 2 litters/group | Methods "animal" | maximum and minimum are at the ends of the whiskers | Fig. legend | P(Naive vs Type-A)=0.7071  | Fig. legend | t(6)=0.3942  | Methods "Statistic" |
| +<br>- | 4b %         | unpaired t-test | Fig. legend | 4,4 | mice from at least 2 litters/group | Methods "animal" | maximum and minimum are at the ends of the whiskers | Fig. legend | P(Naive vs Type-B)=0.0053  | Fig. legend | t(6)=4.255   | Methods "Statistic" |
| +<br>- | 4b %         | unpaired t-test | Fig. legend | 4,4 | mice from at least 2 litters/group | Methods "animal" | maximum and minimum are at the ends of the whiskers | Fig. legend | P(Type-A vs Type-B)=0.0067 | Fig. legend | t(6)=4.051   | Methods "Statistic" |

|   |       |                     |             |       |                                    |                  |                                                     |             |                                   |                        |             |                     |
|---|-------|---------------------|-------------|-------|------------------------------------|------------------|-----------------------------------------------------|-------------|-----------------------------------|------------------------|-------------|---------------------|
| + | 4b    | unpaired t-test     | Fig. legend | 4,4   | mice from at least 2 litters/group | Methods "animal" | maximum and minimum are at the ends of the whiskers | Fig. legend | P(Naive vs Type-A)=0.0067         | Fig. legend            | t(4)=5.151  | Methods "Statistic" |
| - | MFI   |                     |             |       |                                    |                  |                                                     |             |                                   |                        |             |                     |
| + | 4b    | unpaired t-test     | Fig. legend | 4,4   | mice from at least 2 litters/group | Methods "animal" | maximum and minimum are at the ends of the whiskers | Fig. legend | P(Naive vs Type-B)=0.0006         | Fig. legend            | t(4)=9.794  | Methods "Statistic" |
| - | MFI   |                     |             |       |                                    |                  |                                                     |             |                                   |                        |             |                     |
| + | 4b    | unpaired t-test     | Fig. legend | 4,4   | mice from at least 2 litters/group | Methods "animal" | maximum and minimum are at the ends of the whiskers | Fig. legend | P(Type-A vs Type-B)=0.0024        | Fig. legend            | t(4)=6.843  | Methods "Statistic" |
| - | MFI   |                     |             |       |                                    |                  |                                                     |             |                                   |                        |             |                     |
| + | 4c    | Mann-Whitney U test | Fig. legend | 18,18 | patents sample                     | Methods "animal" | data points plotted                                 | Fig. legend | P(CXCR2)=0.0435                   | Fig. legend            | n.a.        | n.a.                |
| - |       |                     |             |       |                                    |                  |                                                     |             |                                   |                        |             |                     |
| + | 4c    | Mann-Whitney U test | Fig. legend | 18,18 | patents sample                     | Methods "animal" | data points plotted                                 | Fig. legend | P(CXCR1)=0.0224                   | Fig. legend            | n.a.        | n.a.                |
| - |       |                     |             |       |                                    |                  |                                                     |             |                                   |                        |             |                     |
| + | 4c    | Mann-Whitney U test | Fig. legend | 18,18 | patents sample                     | Methods "animal" | data points plotted                                 | Fig. legend | P(LTBR)=0.0129                    | Fig. legend            | n.a.        | n.a.                |
| - |       |                     |             |       |                                    |                  |                                                     |             |                                   |                        |             |                     |
| + | 5b    | unpaired t-test     | Fig. legend | 5,3   | mice from at least 2 litters/group | Methods "animal" | maximum and minimum are at the ends of the whiskers | Fig. legend | P(Naive vs Type-A)=0.8676         | Fig. legend            | t(6)=0.174  | Methods "Statistic" |
| - |       |                     |             |       |                                    |                  |                                                     |             |                                   |                        |             |                     |
| + | 5b    | unpaired t-test     | Fig. legend | 5,5   | mice from at least 2 litters/group | Methods "animal" | maximum and minimum are at the ends of the whiskers | Fig. legend | P(Naive vs Type-B)=0.0059         | Fig. legend            | t(8)=3.722  | Methods "Statistic" |
| - |       |                     |             |       |                                    |                  |                                                     |             |                                   |                        |             |                     |
| + | 5b    | unpaired t-test     | Fig. legend | 3,5   | mice from at least 2 litters/group | Methods "animal" | maximum and minimum are at the ends of the whiskers | Fig. legend | P(Type-A vs Type-B)=0.0334        | Fig. legend            | t(6)=2.749  | Methods "Statistic" |
| - |       |                     |             |       |                                    |                  |                                                     |             |                                   |                        |             |                     |
| + | 5d    | unpaired t-test     | Fig. legend | 4,4   | mice from at least 2 litters/group | Methods "animal" | maximum and minimum are at the ends of the whiskers | Fig. legend | P=0.0174                          | Fig. legend            | t(6)=3.252  | Methods "Statistic" |
| - |       |                     |             |       |                                    |                  |                                                     |             |                                   |                        |             |                     |
| + | 5f    | unpaired t-test     | Fig. legend | 5,7   | mice from at least 2 litters/group | Methods "animal" | error bars are mean +/- SEM                         | Fig. legend | P=0.002,                          |                        | t(10)=5.634 | Methods "Statistic" |
| - |       |                     |             |       |                                    |                  |                                                     |             |                                   |                        |             |                     |
| + | 5g    | unpaired t-test     | Fig. legend | 7,7   | mice from at least 2 litters/group | Methods "animal" | maximum and minimum are at the ends of the whiskers | Fig. legend | P=0.0192                          | FFig. legendig. legend | t(14)=2.646 | Methods "Statistic" |
| - |       |                     |             |       |                                    |                  |                                                     |             |                                   |                        |             |                     |
| + | 5i    | unpaired t-test     | Fig. legend | 4,4   | mice from at least 2 litters/group | Methods "animal" | maximum and minimum are at the ends of the whiskers | Fig. legend | P=0.0002                          | Fig. legend            | t(6)=7.72   | Methods "Statistic" |
| - |       |                     |             |       |                                    |                  |                                                     |             |                                   |                        |             |                     |
| + | 5i    | unpaired t-test     | Fig. legend | 4,4   | mice from at least 2 litters/group | Methods "animal" | maximum and minimum are at the ends of the whiskers | Fig. legend | P=0.0026                          | Fig. legend            | t(6)=4.931  | Methods "Statistic" |
| - |       |                     |             |       |                                    |                  |                                                     |             |                                   |                        |             |                     |
| + | 5j    | unpaired t-test     | Fig. legend | 4,4   | mice from at least 2 litters/group | Methods "animal" | maximum and minimum are at the ends of the whiskers | Fig. legend | P(Naive vs Type-A)=0.0152         | Fig. legend            | t(6)=3.361  | Methods "Statistic" |
| - | IL-1b |                     |             |       |                                    |                  |                                                     |             |                                   |                        |             |                     |
| + | 5j    | unpaired t-test     | Fig. legend | 4,4   | mice from at least 2 litters/group | Methods "animal" | maximum and minimum are at the ends of the whiskers | Fig. legend | P(Naive vs Type-A +MHV68)=0.3925  | Fig. legend            | t(6)=0.9212 | Methods "Statistic" |
| - | IL-1b |                     |             |       |                                    |                  |                                                     |             |                                   |                        |             |                     |
| + | 5j    | unpaired t-test     | Fig. legend | 4,4   | mice from at least 2 litters/group | Methods "animal" | maximum and minimum are at the ends of the whiskers | Fig. legend | P(Type-A vs Type-A +MHV68)=0.0259 | Fig. legend            | t(6)=2.942  | Methods "Statistic" |
| - | IL-1b |                     |             |       |                                    |                  |                                                     |             |                                   |                        |             |                     |

|        |                                            |                        |                 |     |                                       |                     |                                                              |                |                                            |                |             |                        |
|--------|--------------------------------------------|------------------------|-----------------|-----|---------------------------------------|---------------------|--------------------------------------------------------------|----------------|--------------------------------------------|----------------|-------------|------------------------|
| +<br>- | 5j<br>CXCL<br>1                            | unpaired t-<br>test    | Fig.<br>legend  | 4,4 | mice from at least<br>2 litters/group | Methods<br>"animal" | maximum and<br>minimum are at<br>the ends of the<br>whiskers | Fig.<br>legend | P(Naive vs<br>Type-A)<br>=0.8498           | Fig.<br>legend | t(6)=0.1978 | Methods<br>"Statistic" |
| +<br>- | 5j<br>CXCL<br>1                            | unpaired t-<br>test    | Fig.<br>legend  | 4,4 | mice from at least<br>2 litters/group | Methods<br>"animal" | maximum and<br>minimum are at<br>the ends of the<br>whiskers | Fig.<br>legend | P(Naive vs<br>Type-A<br>+MHV68)=0.0<br>174 | Fig.<br>legend | t(6)=3.252  | Methods<br>"Statistic" |
| +<br>- | 5j<br>CXCL<br>1                            | unpaired t-<br>test    | Fig.<br>legend  | 4,4 | mice from at least<br>2 litters/group | Methods<br>"animal" | maximum and<br>minimum are at<br>the ends of the<br>whiskers | Fig.<br>legend | P(Type-A vs<br>Type-A<br>+MHV68)<br>0.0205 | Fig.<br>legend | t(6)=3.124  | Methods<br>"Statistic" |
| +<br>- | 6d<br>total<br>moto<br>r<br>neur<br>on     | Bonferroni's<br>Method | Fig.<br>legend  | 4,4 | mice from at least<br>2 litters/group | Methods<br>"animal" | maximum and<br>minimum are at<br>the ends of the<br>whiskers | Fig.<br>legend | P=0.0001                                   | Fig.<br>legend | F=20.61     | Methods<br>"Statistic" |
| +<br>- | 6d<br>alph<br>a<br>moro<br>t<br>neur<br>on | Bonferroni's<br>Method | BFig.<br>legend | 4,4 | mice from at least<br>2 litters/group | Methods<br>"animal" | maximum and<br>minimum are at<br>the ends of the<br>whiskers | Fig.<br>legend | P=0.0032                                   | Fig.<br>legend | F=11.65     | Methods<br>"Statistic" |
| +<br>- | 7b                                         | unpaired t-<br>test    | Fig.<br>legend  | 3,3 | mice from at least<br>2 litters/group | Methods<br>"animal" | maximum and<br>minimum are at<br>the ends of the<br>whiskers | Fig.<br>legend | P(Naive vs<br>Type-A)<br>=0.5044           | Fig.<br>legend | t(4)=0.7324 | Methods<br>"Statistic" |
| +<br>- | 7b                                         | unpaired t-<br>test    | Fig.<br>legend  | 3,3 | mice from at least<br>2 litters/group | Methods<br>"animal" | maximum and<br>minimum are at<br>the ends of the<br>whiskers | Fig.<br>legend | P(Naive vs<br>Type-B)<br>=0.0005           | Fig.<br>legend | t(4)=10.11  | Methods<br>"Statistic" |
| +<br>- | 7b                                         | unpaired t-<br>test    | Fig.<br>legend  | 3,3 | mice from at least<br>2 litters/group | Methods<br>"animal" | maximum and<br>minimum are at<br>the ends of the<br>whiskers | Fig.<br>legend | P(Type-A vs<br>Type-B)<br>=0.0017          | Fig.<br>legend | t(4)=7.54   | Methods<br>"Statistic" |
| +<br>- | 7c                                         | unpaired t-<br>test    | Fig.<br>legend  | 3,3 | mice from at least<br>2 litters/group | Methods<br>"animal" | maximum and<br>minimum are at<br>the ends of the<br>whiskers | Fig.<br>legend | P(Naive vs<br>Type-A)=<br>0.1966           | Fig.<br>legend | t(4)=1.548  | Methods<br>"Statistic" |
| +<br>- | 7c                                         | unpaired t-<br>test    | Fig.<br>legend  | 3,3 | mice from at least<br>2 litters/group | Methods<br>"animal" | maximum and<br>minimum are at<br>the ends of the<br>whiskers | Fig.<br>legend | P(Naive vs<br>Type-B)<br>=0.0007           | Fig.<br>legend | t(4)=9.387  | Methods<br>"Statistic" |
| +<br>- | 7c                                         | unpaired t-<br>test    | Fig.<br>legend  | 3,3 | mice from at least<br>2 litters/group | Methods<br>"animal" | maximum and<br>minimum are at<br>the ends of the<br>whiskers | Fig.<br>legend | P(Type-A vs<br>Type-B)<br>=0.0008          | Fig.<br>legend | t(4)=9.22   | Methods<br>"Statistic" |
| +<br>- | 7d                                         | unpaired t-<br>test    | Fig.<br>legend  | 3,3 | mice from at least<br>2 litters/group | Methods<br>"animal" | maximum and<br>minimum are at<br>the ends of the<br>whiskers | Fig.<br>legend | P(Sema3d)=0.<br>0599                       | Fig.<br>legend | t(2)=3.899  | Methods<br>"Statistic" |
| +<br>- | 7d                                         | unpaired t-<br>test    | Fig.<br>legend  | 3,3 | mice from at least<br>2 litters/group | Methods<br>"animal" | maximum and<br>minimum are at<br>the ends of the<br>whiskers | Fig.<br>legend | P(Sema3f)=0.8<br>657                       | Fig.<br>legend | t(2)=0.1916 | Methods<br>"Statistic" |
| +<br>- | 7d                                         | unpaired t-<br>test    | Fig.<br>legend  | 3,3 | mice from at least<br>2 litters/group | Methods<br>"animal" | maximum and<br>minimum are at<br>the ends of the<br>whiskers | Fig.<br>legend | P(Sema4a)=0.<br>4043                       | Fig.<br>legend | t(2)=1.049  | Methods<br>"Statistic" |
| +<br>- | 7d                                         | unpaired t-<br>test    | Fig.<br>legend  | 3,3 | mice from at least<br>2 litters/group | Methods<br>"animal" | maximum and<br>minimum are at<br>the ends of the<br>whiskers | Fig.<br>legend | P(Sema4d)=0.<br>0792                       | Fig.<br>legend | t(2)=3.339  | Methods<br>"Statistic" |



|        |           |                 |             |     |                                    |                  |                                                     |             |                                                             |             |             |                     |
|--------|-----------|-----------------|-------------|-----|------------------------------------|------------------|-----------------------------------------------------|-------------|-------------------------------------------------------------|-------------|-------------|---------------------|
| +<br>- | 7d        | unpaired t-test | Fig. legend | 3,3 | mice from at least 2 litters/group | Methods "animal" | maximum and minimum are at the ends of the whiskers | Fig. legend | P(Sema6b)=0.0175                                            | Fig. legend | t(5)=34.91  | Methods "Statistic" |
| +<br>- | 7d        | unpaired t-test | Fig. legend | 3,3 | mice from at least 2 litters/group | Methods "animal" | maximum and minimum are at the ends of the whiskers | Fig. legend | P(Efna1)=0.0318                                             | Fig. legend | t(2)=5.472  | Methods "Statistic" |
| +<br>- | 7d        | unpaired t-test | Fig. legend | 3,3 | mice from at least 2 litters/group | Methods "animal" | maximum and minimum are at the ends of the whiskers | Fig. legend | P(Efna2)=0.4476                                             | Fig. legend | t(2)=0.9373 | Methods "Statistic" |
| +<br>- | 7d        | unpaired t-test | Fig. legend | 3,3 | mice from at least 2 litters/group | Methods "animal" | maximum and minimum are at the ends of the whiskers | Fig. legend | P(Efna5)=0.2419                                             | Fig. legend | t(2)=1.644  | Methods "Statistic" |
| +<br>- | 7d        | unpaired t-test | Fig. legend | 3,3 | mice from at least 2 litters/group | Methods "animal" | maximum and minimum are at the ends of the whiskers | Fig. legend | P(Efna1)=0.0658                                             | Fig. legend | t(2)=3.704  | Methods "Statistic" |
| +<br>- | 7d        | unpaired t-test | Fig. legend | 3,3 | mice from at least 2 litters/group | Methods "animal" | maximum and minimum are at the ends of the whiskers | Fig. legend | P(Efna2)=0.8169                                             | Fig. legend | t(2)=0.2634 | Methods "Statistic" |
| +<br>- | 7d        | unpaired t-test | Fig. legend | 3,3 | mice from at least 2 litters/group | Methods "animal" | maximum and minimum are at the ends of the whiskers | Fig. legend | P(Efna3)=0.6110                                             | Fig. legend | t(2)=0.5059 | Methods "Statistic" |
| +<br>- | 7f length | unpaired t-test | Fig. legend | 3,3 | mice from at least 2 litters/group | Methods "animal" | maximum and minimum are at the ends of the whiskers | Fig. legend | P(Naive T vs Type-B T +Control shRNA)=0.0096                | Fig. legend | t(4)=4.657  | Methods "Statistic" |
| +<br>- | 7f length | unpaired t-test | Fig. legend | 3,3 | mice from at least 2 litters/group | Methods "animal" | maximum and minimum are at the ends of the whiskers | Fig. legend | P(Naive T vs Type-B T +Sema6b shRNA)=0.3377                 | Fig. legend | t(4)=1.088  | Methods "Statistic" |
| +<br>- | 7f length | unpaired t-test | Fig. legend | 3,3 | mice from at least 2 litters/group | Methods "animal" | maximum and minimum are at the ends of the whiskers | Fig. legend | P(Type-B T +Control shRNA vs Type-B T +Sema6b shRNA) 0.0169 | Fig. legend | t(4)=3.944  | Methods "Statistic" |
| +<br>- | 7f number | unpaired t-test | Fig. legend | 3,3 | mice from at least 2 litters/group | Methods "animal" | maximum and minimum are at the ends of the whiskers | Fig. legend | P(Naive T vs Type-B T +Control shRNA)=0.0233                | Fig. legend | t(4)=3.573  | Methods "Statistic" |
| +<br>- | 7f number | unpaired t-test | Fig. legend | 3,3 | mice from at least 2 litters/group | Methods "animal" | maximum and minimum are at the ends of the whiskers | Fig. legend | P(Naive T vs Type-B T +Sema6b shRNA)=0.6259                 | Fig. legend | t(4)=0.5273 | Methods "Statistic" |
| +<br>- | 7f number | unpaired t-test | Fig. legend | 3,3 | mice from at least 2 litters/group | Methods "animal" | maximum and minimum are at the ends of the whiskers | Fig. legend | P(Type-B T +Control shRNA vs Type-B T +Sema6b shRNA)=0.0215 | Fig. legend | t(4)=3.662  | Methods "Statistic" |
| +<br>- | 7g        | unpaired t-test | Fig. legend | 3,3 | mice from at least 2 litters/group | Methods "animal" | maximum and minimum are at the ends of the whiskers | Fig. legend | P =0.0039                                                   | Fig. legend | t(4)=5.981  | Methods "Statistic" |

|        |                    |                 |             |     |                                    |                  |                                                     |             |                            |             |             |                     |
|--------|--------------------|-----------------|-------------|-----|------------------------------------|------------------|-----------------------------------------------------|-------------|----------------------------|-------------|-------------|---------------------|
| +<br>- | 7h                 | unpaired t-test | Fig. legend | 3,3 | mice from at least 2 litters/group | Methods "animal" | maximum and minimum are at the ends of the whiskers | Fig. legend | P (length)=0.0211          | Fig. legend | t(4)=3.686  | Methods "Statistic" |
| +<br>- | 7h                 | unpaired t-test | Fig. legend | 3,3 | mice from at least 2 litters/group | Methods "animal" | maximum and minimum are at the ends of the whiskers | Fig. legend | P (number)=0.017           | Fig. legend | t(4)=7.544  | Methods "Statistic" |
| +<br>- | Sup 1b             | unpaired t-test | Fig. legend | 4,5 | mice from at least 2 litters/group | Methods "animal" | maximum and minimum are at the ends of the whiskers | Fig. legend | P(Method 1 vs 2)=0.0006    | Fig. legend | t(7)=5.98   | Methods "Statistic" |
| +<br>- | Sup 1b             | unpaired t-test | Fig. legend | 4,5 | mice from at least 2 litters/group | Methods "animal" | maximum and minimum are at the ends of the whiskers | Fig. legend | P(Method 1 vs 3) <0.0001   | Fig. legend | t(7)=12.54  | Methods "Statistic" |
| +<br>- | Sup 1b             | unpaired t-test | Fig. legend | 4,5 | mice from at least 2 litters/group | Methods "animal" | maximum and minimum are at the ends of the whiskers | Fig. legend | P(Method 1 vs 4)=0.0027    | Fig. legend | t(7)=4.54   | Methods "Statistic" |
| +<br>- | Sup 1b             | unpaired t-test | Fig. legend | 4,5 | mice from at least 2 litters/group | Methods "animal" | maximum and minimum are at the ends of the whiskers | Fig. legend | P(Method 1 vs 5) <0.0001   | Fig. legend | t(7)=8.15   | Methods "Statistic" |
| +<br>- | Sup 1b             | unpaired t-test | Fig. legend | 4,5 | mice from at least 2 litters/group | Methods "animal" | maximum and minimum are at the ends of the whiskers | Fig. legend | P(Method 1 vs 6) <0.0001   | Fig. legend | t(7)=10.63  | Methods "Statistic" |
| +<br>- | Sup1 c-Brain       | unpaired t-test | Fig. legend | 4,4 | mice from at least 2 litters/group | Methods "animal" | maximum and minimum are at the ends of the whiskers | Fig. legend | P(WT vs Nlrp3-/-)=0.8159   | Fig. legend | t(6)=0.2433 | Methods "Statistic" |
| +<br>- | Sup1 c-Brain       | unpaired t-test | Fig. legend | 4,4 | mice from at least 2 litters/group | Methods "animal" | maximum and minimum are at the ends of the whiskers | Fig. legend | P(WT vs Asc-/-)=0.5685     | Fig. legend | t(6)=0.6031 | Methods "Statistic" |
| +<br>- | Sup1 c-Spinal cord | unpaired t-test | Fig. legend | 4,4 | mice from at least 2 litters/group | Methods "animal" | maximum and minimum are at the ends of the whiskers | Fig. legend | P(WT vs Nlrp3-/-)=0.5226   | Fig. legend | t(6)=0.6787 | Methods "Statistic" |
| +<br>- | Sup1 c-Spinal cord | unpaired t-test | Fig. legend | 4,4 | mice from at least 2 litters/group | Methods "animal" | maximum and minimum are at the ends of the whiskers | Fig. legend | P(WT vs Asc-/-)=0.8984     | Fig. legend | t(6)=0.1332 | Methods "Statistic" |
| +<br>- | Sup 1f             | unpaired t-test | Fig. legend | 3,3 | mice from at least 2 litters/group | Methods "animal" | maximum and minimum are at the ends of the whiskers | Fig. legend | P(Naive vs Type-A)=0.0059  | Fig. legend | t(4)=5.344  | Methods "Statistic" |
| +<br>- | Sup 1f             | unpaired t-test | Fig. legend | 3,3 | mice from at least 2 litters/group | Methods "animal" | maximum and minimum are at the ends of the whiskers | Fig. legend | P(Naive vs Type-B) <0.0001 | Fig. legend | t(4)=18.55  | Methods "Statistic" |
| +<br>- | Sup 1f             | unpaired t-test | Fig. legend | 3,3 | mice from at least 2 litters/group | Methods "animal" | maximum and minimum are at the ends of the whiskers | Fig. legend | P(Type-A vs Type-B)=0.0004 | Fig. legend | t(4)=10.83  | Methods "Statistic" |
| +<br>- | Sup 1g             | unpaired t-test | Fig. legend | 3,3 | mice from at least 2 litters/group | Methods "animal" | maximum and minimum are at the ends of the whiskers | Fig. legend | P=0.0261                   | Fig. legend | t(6)=2.724  | Methods "Statistic" |
| +<br>- | Sup 1h             | unpaired t-test | Fig. legend | 3,3 | mice from at least 2 litters/group | Methods "animal" | maximum and minimum are at the ends of the whiskers | Fig. legend | P=0.0020                   | Fig. legend | t(6)=4.794  | Methods "Statistic" |

|   |   |                    |                 |             |     |                                    |                  |                     |             |                 |             |             |                     |
|---|---|--------------------|-----------------|-------------|-----|------------------------------------|------------------|---------------------|-------------|-----------------|-------------|-------------|---------------------|
| + | - | Sup 1i Brain       | unpaired t-test | Fig. legend | 7,7 | mice from at least 2 litters/group | Methods "animal" | data points plotted | Fig. legend | P(Total)=0.0028 | Fig. legend | t(12)=3.747 | Methods "Statistic" |
| + | - | Sup 1i Brain       | unpaired t-test | Fig. legend | 7,7 | mice from at least 2 litters/group | Methods "animal" | data points plotted | Fig. legend | P(CD4)=0.018    | Fig. legend | t(12)=2.737 | Methods "Statistic" |
| + | - | Sup 1i Brain       | unpaired t-test | Fig. legend | 7,7 | mice from at least 2 litters/group | Methods "animal" | data points plotted | Fig. legend | P(Th17)=0.0167  | Fig. legend | t(12)=2.78  | Methods "Statistic" |
| + | - | Sup 1i Brain       | unpaired t-test | Fig. legend | 7,7 | mice from at least 2 litters/group | Methods "animal" | data points plotted | Fig. legend | P(Th1)=0.0165   | Fig. legend | t(12)=2.784 | Methods "Statistic" |
| + | - | Sup 1i Brain       | unpaired t-test | Fig. legend | 7,7 | mice from at least 2 litters/group | Methods "animal" | data points plotted | Fig. legend | P(CD8)=0.0329   | Fig. legend | t(12)=2.41  | Methods "Statistic" |
| + | - | Sup 1i Brain       | unpaired t-test | Fig. legend | 7,7 | mice from at least 2 litters/group | Methods "animal" | data points plotted | Fig. legend | P(B)=0.0013     | Fig. legend | t(12)=4.165 | Methods "Statistic" |
| + | - | Sup 1i Brain       | unpaired t-test | Fig. legend | 7,7 | mice from at least 2 litters/group | Methods "animal" | data points plotted | Fig. legend | P(DC)=0.0003    | Fig. legend | t(12)=5.008 | Methods "Statistic" |
| + | - | Sup 1i Brain       | unpaired t-test | Fig. legend | 7,7 | mice from at least 2 litters/group | Methods "animal" | data points plotted | Fig. legend | P(PMN)=0.0004   | Fig. legend | t(12)=4.912 | Methods "Statistic" |
| + | - | Sup 1i Brain       | unpaired t-test | Fig. legend | 7,7 | mice from at least 2 litters/group | Methods "animal" | data points plotted | Fig. legend | P(Mac)=0.0027   | Fig. legend | t(12)=3.759 | Methods "Statistic" |
| + | - | Sup 1i Spinal cord | unpaired t-test | Fig. legend | 7,7 | mice from at least 2 litters/group | Methods "animal" | data points plotted | Fig. legend | P(Total)=0.0035 | Fig. legend | t(12)=3.621 | Methods "Statistic" |
| + | - | Sup 1i Spinal cord | unpaired t-test | Fig. legend | 7,7 | mice from at least 2 litters/group | Methods "animal" | data points plotted | Fig. legend | P(CD4)=0.0002   | Fig. legend | t(12)=5.372 | Methods "Statistic" |
| + | - | Sup 1i Spinal cord | unpaired t-test | Fig. legend | 7,7 | mice from at least 2 litters/group | Methods "animal" | data points plotted | Fig. legend | P(Th17)=0.0003  | Fig. legend | t(12)=4.997 | Methods "Statistic" |
| + | - | Sup 1i Spinal cord | unpaired t-test | Fig. legend | 7,7 | mice from at least 2 litters/group | Methods "animal" | data points plotted | Fig. legend | P(Th1)=0.00465  | Fig. legend | t(12)=2.221 | Methods "Statistic" |
| + | - | Sup 1i Spinal cord | unpaired t-test | Fig. legend | 7,7 | mice from at least 2 litters/group | Methods "animal" | data points plotted | Fig. legend | P(CD8)=0.0104   | Fig. legend | t(12)=3.032 | Methods "Statistic" |
| + | - | Sup 1i Spinal cord | unpaired t-test | Fig. legend | 7,7 | mice from at least 2 litters/group | Methods "animal" | data points plotted | Fig. legend | P(B)=0.0918     | Fig. legend | t(12)=1.833 | Methods "Statistic" |
| + | - | Sup 1i Spinal cord | unpaired t-test | Fig. legend | 7,7 | mice from at least 2 litters/group | Methods "animal" | data points plotted | Fig. legend | P(DC)=0.0429    | Fig. legend | t(12)=2.263 | Methods "Statistic" |
| + | - | Sup 1i Spinal cord | unpaired t-test | Fig. legend | 7,7 | mice from at least 2 litters/group | Methods "animal" | data points plotted | Fig. legend | P(PMN)=0.0011   | Fig. legend | t(12)=4.29  | Methods "Statistic" |

|   |                             |                     |                |     |                                       |                     |                                                              |                |                                   |                |              |                        |
|---|-----------------------------|---------------------|----------------|-----|---------------------------------------|---------------------|--------------------------------------------------------------|----------------|-----------------------------------|----------------|--------------|------------------------|
| + | Sup1<br>i<br>Spinal<br>cord | unpaired t-<br>test | Fig.<br>legend | 7,7 | mice from at least<br>2 litters/group | Methods<br>"animal" | data points<br>plotted                                       | Fig.<br>legend | P(Mac)=0.089                      | Fig.<br>legend | t(12)=1.849  | Methods<br>"Statistic" |
| + | Sup1l                       | unpaired t-<br>test | Fig.<br>legend | 8,8 | mice from at least<br>2 litters/group | Methods<br>"animal" | maximum and<br>minimum are at<br>the ends of the<br>whiskers | Fig.<br>legend | P(Naive vs<br>Type-A)<br>=0.1524  | Fig.<br>legend | t(14)=1.514  | Methods<br>"Statistic" |
| + | Sup1l                       | unpaired t-<br>test | Fig.<br>legend | 8,8 | mice from at least<br>2 litters/group | Methods<br>"animal" | maximum and<br>minimum are at<br>the ends of the<br>whiskers | Fig.<br>legend | P(Naive vs<br>Type-B)<br>=0.0013  | Fig.<br>legend | t(14)=4.026  | Methods<br>"Statistic" |
| + | Sup1l                       | unpaired t-<br>test | Fig.<br>legend | 8,8 | mice from at least<br>2 litters/group | Methods<br>"animal" | maximum and<br>minimum are at<br>the ends of the<br>whiskers | Fig.<br>legend | P(Type-A vs<br>Type-B)<br>=0.0217 | Fig.<br>legend | t(14)=2.582  | Methods<br>"Statistic" |
| + | Sup<br>2b                   | unpaired t-<br>test | Fig.<br>legend | 4,3 | mice from at least<br>2 litters/group | Methods<br>"animal" | maximum and<br>minimum are at<br>the ends of the<br>whiskers | Fig.<br>legend | P(Naive vs<br>Type-A)<br>=0.1340  | Fig.<br>legend | t(5)=1.7887  | Methods<br>"Statistic" |
| + | Sup<br>2b                   | unpaired t-<br>test | Fig.<br>legend | 4,4 | mice from at least<br>2 litters/group | Methods<br>"animal" | maximum and<br>minimum are at<br>the ends of the<br>whiskers | Fig.<br>legend | P(Naive vs<br>Type-B)<br>=0.0024  | Fig.<br>legend | t(6)=45.021  | Methods<br>"Statistic" |
| + | Sup<br>2b                   | unpaired t-<br>test | Fig.<br>legend | 3,4 | mice from at least<br>2 litters/group | Methods<br>"animal" | maximum and<br>minimum are at<br>the ends of the<br>whiskers | Fig.<br>legend | P(Type-A vs<br>Type-B)<br>=0.0268 | Fig.<br>legend | t(5)=3.101   | Methods<br>"Statistic" |
| + | Sup<br>2c                   | unpaired t-<br>test | Fig.<br>legend | 4,4 | mice from at least<br>2 litters/group | Methods<br>"animal" | maximum and<br>minimum are at<br>the ends of the<br>whiskers | Fig.<br>legend | P(Naive vs<br>Type-A)<br>=0.7939  | Fig.<br>legend | t(6)=0.2732  | Methods<br>"Statistic" |
| + | Sup<br>2c                   | unpaired t-<br>test | Fig.<br>legend | 4,4 | mice from at least<br>2 litters/group | Methods<br>"animal" | maximum and<br>minimum are at<br>the ends of the<br>whiskers | Fig.<br>legend | P(Naive vs<br>Type-B)<br>=0.0040  | Fig.<br>legend | t(6)=4.519   | Methods<br>"Statistic" |
| + | Sup<br>2c                   | unpaired t-<br>test | Fig.<br>legend | 4,4 | mice from at least<br>2 litters/group | Methods<br>"animal" | maximum and<br>minimum are at<br>the ends of the<br>whiskers | Fig.<br>legend | P(Type-A vs<br>Type-B)<br>=0.0095 | Fig.<br>legend | t(6)=3.748   | Methods<br>"Statistic" |
| + | Sup<br>4a<br>DLNs           | unpaired t-<br>test | Fig.<br>legend | 4,4 | mice from at least<br>2 litters/group | Methods<br>"animal" | maximum and<br>minimum are at<br>the ends of the<br>whiskers | Fig.<br>legend | P(Total)=0.20<br>73               | Fig.<br>legend | t(6)=1.413   | Methods<br>"Statistic" |
| + | Sup<br>4a<br>DLNs           | unpaired t-<br>test | Fig.<br>legend | 4,4 | mice from at least<br>2 litters/group | Methods<br>"animal" | maximum and<br>minimum are at<br>the ends of the<br>whiskers | Fig.<br>legend | P(CD3)=0.846<br>6,                | Fig.<br>legend | t(6)=0.202   | Methods<br>"Statistic" |
| + | Sup<br>4a<br>DLNs           | unpaired t-<br>test | Fig.<br>legend | 4,4 | mice from at least<br>2 litters/group | Methods<br>"animal" | maximum and<br>minimum are at<br>the ends of the<br>whiskers | Fig.<br>legend | P(CD4)=0.928<br>5                 | Fig.<br>legend | t(6)=0.09353 | Methods<br>"Statistic" |
| + | Sup<br>4a<br>DLNs           | unpaired t-<br>test | Fig.<br>legend | 4,4 | mice from at least<br>2 litters/group | Methods<br>"animal" | maximum and<br>minimum are at<br>the ends of the<br>whiskers | Fig.<br>legend | P(CD8)=0.741<br>3                 | Fig.<br>legend | t(6)=0.3459  | Methods<br>"Statistic" |
| + | Sup<br>4a<br>DLNs           | unpaired t-<br>test | Fig.<br>legend | 4,4 | mice from at least<br>2 litters/group | Methods<br>"animal" | maximum and<br>minimum are at<br>the ends of the<br>whiskers | Fig.<br>legend | P(B)=0.4141                       | Fig.<br>legend | t(6)=0.8773  | Methods<br>"Statistic" |
| + | Sup<br>4a<br>DLNs           | unpaired t-<br>test | Fig.<br>legend | 4,4 | mice from at least<br>2 litters/group | Methods<br>"animal" | maximum and<br>minimum are at<br>the ends of the<br>whiskers | Fig.<br>legend | P(Th17)=0.97<br>24                | Fig.<br>legend | t(6)=0.03605 | Methods<br>"Statistic" |

|   |                              |                     |                |     |                                       |                     |                                                              |                |                                   |                |              |                        |
|---|------------------------------|---------------------|----------------|-----|---------------------------------------|---------------------|--------------------------------------------------------------|----------------|-----------------------------------|----------------|--------------|------------------------|
| + | Sup<br>4a<br>-<br>DLNs       | unpaired t-<br>test | Fig.<br>legend | 4,4 | mice from at least<br>2 litters/group | Methods<br>"animal" | maximum and<br>minimum are at<br>the ends of the<br>whiskers | Fig.<br>legend | P(Th1)=0.9017                     | Fig.<br>legend | t(6)=0.1289  | Methods<br>"Statistic" |
| + | Sup<br>4a<br>-<br>DLNs       | unpaired t-<br>test | Fig.<br>legend | 4,4 | mice from at least<br>2 litters/group | Methods<br>"animal" | maximum and<br>minimum are at<br>the ends of the<br>whiskers | Fig.<br>legend | P(Treg)=0.355<br>6                | Fig.<br>legend | t(6)=1.001   | Methods<br>"Statistic" |
| + | Sup<br>4a<br>-<br>Splee<br>n | unpaired t-<br>test | Fig.<br>legend | 4,4 | mice from at least<br>2 litters/group | Methods<br>"animal" | maximum and<br>minimum are at<br>the ends of the<br>whiskers | Fig.<br>legend | P(Total)=0.00<br>72               | Fig.<br>legend | t(6)=3.99    | Methods<br>"Statistic" |
| + | Sup<br>4a<br>-<br>Splee<br>n | unpaired t-<br>test | Fig.<br>legend | 4,4 | mice from at least<br>2 litters/group | Methods<br>"animal" | maximum and<br>minimum are at<br>the ends of the<br>whiskers | Fig.<br>legend | P(CD3)=0.253<br>7                 | Fig.<br>legend | t(6)=1.262   | Methods<br>"Statistic" |
| + | Sup<br>4a<br>-<br>Splee<br>n | unpaired t-<br>test | Fig.<br>legend | 4,4 | mice from at least<br>2 litters/group | Methods<br>"animal" | maximum and<br>minimum are at<br>the ends of the<br>whiskers | Fig.<br>legend | P(CD4)=0.178<br>1                 | Fig.<br>legend | t(6)=1.525   | Methods<br>"Statistic" |
| + | Sup<br>4a<br>-<br>Splee<br>n | unpaired t-<br>test | Fig.<br>legend | 4,4 | mice from at least<br>2 litters/group | Methods<br>"animal" | maximum and<br>minimum are at<br>the ends of the<br>whiskers | Fig.<br>legend | P(CD8)=0.399<br>9                 | Fig.<br>legend | t(6)=0.906   | Methods<br>"Statistic" |
| + | Sup<br>4a<br>-<br>Splee<br>n | unpaired t-<br>test | Fig.<br>legend | 4,4 | mice from at least<br>2 litters/group | Methods<br>"animal" | maximum and<br>minimum are at<br>the ends of the<br>whiskers | Fig.<br>legend | P(B)=0.1371                       | Fig.<br>legend | t(6)=1.715   | Methods<br>"Statistic" |
| + | Sup<br>-<br>4c               | unpaired t-<br>test | Fig.<br>legend | 6,6 | mice from at least<br>2 litters/group | Methods<br>"animal" | maximum and<br>minimum are at<br>the ends of the<br>whiskers | Fig.<br>legend | P<br>(Th17)=0.6568                | Fig.<br>legend | t(10)=0.4579 | Methods<br>"Statistic" |
| + | Sup<br>-<br>4c               | unpaired t-<br>test | Fig.<br>legend | 6,6 | mice from at least<br>2 litters/group | Methods<br>"animal" | maximum and<br>minimum are at<br>the ends of the<br>whiskers | Fig.<br>legend | P<br>(Th1)=0.3954                 | Fig.<br>legend | t(10)=0.8879 | Methods<br>"Statistic" |
| + | Sup<br>-<br>4d               | unpaired t-<br>test | Fig.<br>legend | 4,5 | mice from at least<br>2 litters/group | Methods<br>"animal" | maximum and<br>minimum are at<br>the ends of the<br>whiskers | Fig.<br>legend | P(IFN $\gamma$ )=0.349<br>3       | Fig.<br>legend | t(7)=1.0037  | Methods<br>"Statistic" |
| + | Sup<br>-<br>4d               | unpaired t-<br>test | Fig.<br>legend | 4,5 | mice from at least<br>2 litters/group | Methods<br>"animal" | maximum and<br>minimum are at<br>the ends of the<br>whiskers | Fig.<br>legend | P(GM-<br>CSF)=0.1760              | Fig.<br>legend | t(7)=1.505   | Methods<br>"Statistic" |
| + | Sup<br>-<br>4d               | unpaired t-<br>test | Fig.<br>legend | 4,5 | mice from at least<br>2 litters/group | Methods<br>"animal" | maximum and<br>minimum are at<br>the ends of the<br>whiskers | Fig.<br>legend | P(II-22)=0.285<br>9               | Fig.<br>legend | t(7)=1.155   | Methods<br>"Statistic" |
| + | Sup<br>-<br>4d               | unpaired t-<br>test | Fig.<br>legend | 4,5 | mice from at least<br>2 litters/group | Methods<br>"animal" | maximum and<br>minimum are at<br>the ends of the<br>whiskers | Fig.<br>legend | P(CD5L)=0.26<br>41                | Fig.<br>legend | t(7)=1.214   | Methods<br>"Statistic" |
| + | Sup<br>-<br>4e               | unpaired t-<br>test | Fig.<br>legend | 4,4 | mice from at least<br>2 litters/group | Methods<br>"animal" | maximum and<br>minimum are at<br>the ends of the<br>whiskers | Fig.<br>legend | P(Naive vs<br>Type-A)<br>=0.0102  | Fig.<br>legend | t(6)=3.695   | Methods<br>"Statistic" |
| + | Sup<br>-<br>4e               | unpaired t-<br>test | Fig.<br>legend | 4,4 | mice from at least<br>2 litters/group | Methods<br>"animal" | maximum and<br>minimum are at<br>the ends of the<br>whiskers | Fig.<br>legend | P(Naive vs<br>Type-B)<br>=0.0004  | Fig.<br>legend | t(6)= 7.001  | Methods<br>"Statistic" |
| + | Sup<br>-<br>4e               | unpaired t-<br>test | Fig.<br>legend | 4,4 | mice from at least<br>2 litters/group | Methods<br>"animal" | maximum and<br>minimum are at<br>the ends of the<br>whiskers | Fig.<br>legend | P(Type-A vs<br>Type-B)<br>=0.0022 | Fig.<br>legend | t(6)=5.131   | Methods<br>"Statistic" |

|        |           |                     |                |     |                                       |                     |                                                              |                |                                                                                |                |             |                        |
|--------|-----------|---------------------|----------------|-----|---------------------------------------|---------------------|--------------------------------------------------------------|----------------|--------------------------------------------------------------------------------|----------------|-------------|------------------------|
| +<br>- | Sup<br>4e | unpaired t-<br>test | Fig.<br>legend | 4,4 | mice from at least<br>2 litters/group | Methods<br>"animal" | maximum and<br>minimum are at<br>the ends of the<br>whiskers | Fig.<br>legend | P(Naive vs<br>Type-A)<br>=0.0777                                               | Fig.<br>legend | t(6)=2.125  | Methods<br>"Statistic" |
| +<br>- | Sup<br>4e | unpaired t-<br>test | Fig.<br>legend | 4,4 | mice from at least<br>2 litters/group | Methods<br>"animal" | maximum and<br>minimum are at<br>the ends of the<br>whiskers | Fig.<br>legend | P(Naive vs<br>Type-B)<br>=0.0014                                               | Fig.<br>legend | t(6)= 5.588 | Methods<br>"Statistic" |
| +<br>- | Sup<br>4e | unpaired t-<br>test | Fig.<br>legend | 4,4 | mice from at least<br>2 litters/group | Methods<br>"animal" | maximum and<br>minimum are at<br>the ends of the<br>whiskers | Fig.<br>legend | P(Type-A vs<br>Type-B)<br>=0.0090                                              | Fig.<br>legend | t(6)=3.81   | Methods<br>"Statistic" |
| +<br>- | Sup<br>4e | unpaired t-<br>test | Fig.<br>legend | 4,4 | mice from at least<br>2 litters/group | Methods<br>"animal" | maximum and<br>minimum are at<br>the ends of the<br>whiskers | Fig.<br>legend | P(Naive vs<br>Type-A)<br>=0.0005                                               | Fig.<br>legend | t(6)=6.774  | Methods<br>"Statistic" |
| +<br>- | Sup<br>4e | unpaired t-<br>test | Fig.<br>legend | 4,4 | mice from at least<br>2 litters/group | Methods<br>"animal" | maximum and<br>minimum are at<br>the ends of the<br>whiskers | Fig.<br>legend | P(Naive vs<br>Type-B)<br>=0.0006                                               | Fig.<br>legend | t(6)= 6.48  | Methods<br>"Statistic" |
| +<br>- | Sup<br>4e | unpaired t-<br>test | Fig.<br>legend | 4,4 | mice from at least<br>2 litters/group | Methods<br>"animal" | maximum and<br>minimum are at<br>the ends of the<br>whiskers | Fig.<br>legend | P(Type-A vs<br>Type-B)<br>=0.0161                                              | Fig.<br>legend | t(6)=3.314  | Methods<br>"Statistic" |
| +<br>- | Sup<br>4e | unpaired t-<br>test | Fig.<br>legend | 4,4 | mice from at least<br>2 litters/group | Methods<br>"animal" | maximum and<br>minimum are at<br>the ends of the<br>whiskers | Fig.<br>legend | P(Naive vs<br>Type-A)=0.33                                                     | Fig.<br>legend | , t(6)=1.06 | Methods<br>"Statistic" |
| +<br>- | Sup<br>4e | unpaired t-<br>test | Fig.<br>legend | 4,4 | mice from at least<br>2 litters/group | Methods<br>"animal" | maximum and<br>minimum are at<br>the ends of the<br>whiskers | Fig.<br>legend | P(Naive vs<br>Type-<br>B)=0.0001                                               | Fig.<br>legend | t(6)= 11.11 | Methods<br>"Statistic" |
| +<br>- | Sup<br>4e | unpaired t-<br>test | Fig.<br>legend | 4,4 | mice from at least<br>2 litters/group | Methods<br>"animal" | maximum and<br>minimum are at<br>the ends of the<br>whiskers | Fig.<br>legend | P(Type-A vs<br>Type-B)<br>=0.0001                                              | Fig.<br>legend | t(6)=10.89  | Methods<br>"Statistic" |
| +<br>- | Sup 7     | unpaired t-<br>test | Fig.<br>legend | 3,3 | mice from at least<br>2 litters/group | Methods<br>"animal" | maximum and<br>minimum are at<br>the ends of the<br>whiskers | Fig.<br>legend | P(Naive T vs<br>Type-B T<br>+Control<br>shRNA)=0.001<br>1                      | Fig.<br>legend | t(4)=8.396  | Methods<br>"Statistic" |
| +<br>- | Sup 7     | unpaired t-<br>test | Fig.<br>legend | 3,3 | mice from at least<br>2 litters/group | Methods<br>"animal" | maximum and<br>minimum are at<br>the ends of the<br>whiskers | Fig.<br>legend | P(Type-B T<br>+Control<br>shRNA vs<br>Type-B T<br>+Sema6b<br>shRNA)=0.005<br>1 | Fig.<br>legend | t(4)=5.559  | Methods<br>"Statistic" |

► Representative figures

1. Are any representative images shown (including Western blots and immunohistochemistry/staining) in the paper?

If so, what figure(s)?

Figure 1i, 1j, 5c, 5e, 5h, 6b, 6c, 7a, 7e, 7h  
Supplementary Figure 1i, 1k, 5, 6b-f

2. For each representative image, is there a clear statement of how many times this experiment was successfully repeated and a discussion of any limitations in repeatability?

If so, where is this reported (section, paragraph #)?

Yes. Mentioned in each figure legend.

## ► Statistics and general methods

1. Is there a justification of the sample size?  
If so, how was it justified?  
Where (section, paragraph #)?  
Even if no sample size calculation was performed, authors should report why the sample size is adequate to measure their effect size.
 

No statistical methods were used to predetermine to justify sample sizes, but our sample sizes are similar to those generally employed in the field.
  
2. Are statistical tests justified as appropriate for every figure?  
Where (section, paragraph #)?
  - a. If there is a section summarizing the statistical methods in the methods, is the statistical test for each experiment clearly defined?  

The "Statistical analysis" subsection in Online Method also mentions on statistical analyses.
  
  - b. Do the data meet the assumptions of the specific statistical test you chose (e.g. normality for a parametric test)?  
Where is this described (section, paragraph #)?  

Yes. Mentioned in the Method section.
  
  - c. Is there any estimate of variance within each group of data?  
Is the variance similar between groups that are being statistically compared?  
Where is this described (section, paragraph #)?  

Yes. Mentioned in Figure legends.
  
  - d. Are tests specified as one- or two-sided?  

two-sided
  
  - e. Are there adjustments for multiple comparisons?  

Not applicable
  
3. To promote transparency, *Nature Neuroscience* has stopped allowing bar graphs to report statistics in the papers it publishes. If you have bar graphs in your paper, please make sure to switch them to dot-plots (with central and dispersion statistics displayed) or to box-and-whisker plots to show data distributions.  

We have switched bar graphs to box-and-whisker plots.
  
4. Are criteria for excluding data points reported?  
Was this criterion established prior to data collection?  
Where is this described (section, paragraph #)?  

No.
  
5. Define the method of randomization used to assign subjects (or samples) to the experimental groups and to collect and process data.  
If no randomization was used, state so.  
Where does this appear (section, paragraph #)?  

The research samples were assigned by chance, rather than by choice, to either the experimental group or the control group. The description of randomization was added in the Statistical analysis subsection in Online Methods.

6. Is a statement of the extent to which investigator knew the group allocation during the experiment and in assessing outcome included?  
If no blinding was done, state so.  
Where (section, paragraph #)?
- We have described in Online Methods (subsections of Induction of active EAE and Statistical analysis) that experiments were performed in a blinded fashion.
7. For experiments in live vertebrates, is a statement of compliance with ethical guidelines/regulations included?  
Where (section, paragraph #)?
- We have described in the Animals subsection in Online Methods that the study has been performed under the guideline approved by the Duke University Institutional Animal Care and Use Committee.
8. Is the species of the animals used reported?  
Where (section, paragraph #)?
- The species is described in the Animals subsection in Online Methods.
9. Is the strain of the animals (including background strains of KO/transgenic animals used) reported?  
Where (section, paragraph #)?
- The strains are described in the Animals subsection in Online Methods.
10. Is the sex of the animals/subjects used reported?  
Where (section, paragraph #)?
- The sex is described in the Animals subsection in Online Methods.
11. Is the age of the animals/subjects reported?  
Where (section, paragraph #)?
- The range of age is described in the Animals subsection in Online Methods.
12. For animals housed in a vivarium, is the light/dark cycle reported?  
Where (section, paragraph #)?
- The L/D cycle is described in the Animals subsection in Online Methods.
13. For animals housed in a vivarium, is the housing group (i.e. number of animals per cage) reported?  
Where (section, paragraph #)?
- The group-housing is described in the Animals subsection in Online Methods.
14. For behavioral experiments, is the time of day reported (e.g. light or dark cycle)?  
Where (section, paragraph #)?
- Disease score analysis and video-recording was performed in the middle of the day during the light cycle. This can be found in the Induction of active EAE subsection in Online Methods.
15. Is the previous history of the animals/subjects (e.g. prior drug administration, surgery, behavioral testing) reported?  
Where (section, paragraph #)?
- All the human subjects went through IFN-beta treatment. Detailed information can be found in the subsection "RRMS patient's information and qPCR analysis" in Online Methods.
- a. If multiple behavioral tests were conducted in the same group of animals, is this reported?  
Where (section, paragraph #)?
- No multiple behavioral tests performed.
16. If any animals/subjects were excluded from analysis, is this reported?  
Where (section, paragraph #)?
- This information can be found in the subsection "RRMS patient's information and qPCR analysis" in Online Methods.



- a. How were the criteria for exclusion defined?  
Where is this described (section, paragraph #)?

Human subjects who had treatment(s) other than IFN-beta was excluded. This information can be found in the subsection "RRMS patient's information and qPCR analysis" in Online Methods.

- b. Specify reasons for any discrepancy between the number of animals at the beginning and end of the study.  
Where is this described (section, paragraph #)?

Our data have no discrepancy on this matter.

## ► Reagents

1. Have antibodies been validated for use in the system under study (assay and species)?

To validate antibodies, we included control antibodies in all the experiments.

- a. Is antibody catalog number given?  
Where does this appear (section, paragraph #)?

Included in the Reagents subsection in Online Methods.

- b. Where were the validation data reported (citation, supplementary information, Antibodypedia)?  
Where does this appear (section, paragraph #)?

Antibodies are purchased from commercial vendors. The information is included in the Reagents subsection in Online Methods.

2. Cell line identity

- a. Are any cell lines used in this paper listed in the database of commonly misidentified cell lines maintained by [ICLAC](#) and [NCBI Biosample](#)?  
Where (section, paragraph #)?

No cell line was used in this study.

- b. If yes, include in the Methods section a scientific justification of their use--indicate here in which section and paragraph the justification can be found.

n/a

- c. For each cell line, include in the Methods section a statement that specifies:  
- the source of the cell lines  
- have the cell lines been authenticated? If so, by which method?  
- have the cell lines been tested for mycoplasma contamination?  
Where (section, paragraph #)?

n/a

## ▶ Data availability

Provide a Data availability statement in the Methods section under "Data availability", which should include, where applicable:

- Accession codes for deposited data
- Other unique identifiers (such as DOIs and hyperlinks for any other datasets)
- At a minimum, a statement confirming that all relevant data are available from the authors
- Formal citations of datasets that are assigned DOIs
- A statement regarding data available in the manuscript as source data
- A statement regarding data available with restrictions

See our [data availability and data citations policy page](#) for more information.

Data deposition in a public repository is mandatory for:

- Protein, DNA and RNA sequences
- Macromolecular structures
- Crystallographic data for small molecules
- Microarray data

Deposition is strongly recommended for many other datasets for which structured public repositories exist; more details on our data policy are available [here](#). We encourage the provision of other source data in supplementary information or in unstructured repositories such as [Figshare](#) and [Dryad](#).

We encourage publication of Data Descriptors (see [Scientific Data](#)) to maximize data reuse.

Where is the Data Availability statement provided (section, paragraph #)?

The following sentences were added in Data Availability.

"The RNA-seq data have been deposited in the NCBI Gene Expression Omnibus (GEO) under accession number GSE85946. The data that support the findings of this study are available from the corresponding author upon reasonable request."

## ▶ Computer code/software

Any custom algorithm/software that is central to the methods must be supplied by the authors in a usable and readable form for readers at the time of publication. However, referees may ask for this information at any time during the review process.

1. Identify all custom software or scripts that were required to conduct the study and where in the procedures each was used.

We used the following software.

- FlowJo for flow cytometry data analysis
- ZEN for confocal microscopy image analysis
- TrimGalore toolkit for RNA-Seq data processing
- STAR RNA-seq alignment tool for transcriptome mapping
- EdgeR53 and Bioconductor package for normalization and differential expression of RNA-Seq data
- GSEA for enriched pathways of RNA-Seq data

2. If computer code was used to generate results that are central to the paper's conclusions, include a statement in the Methods section under "**Code availability**" to indicate whether and how the code can be accessed. Include version information as necessary and any restrictions on availability.

n/a

## ▶ Human subjects

1. Which IRB approved the protocol?  
Where is this stated (section, paragraph #)?  

IRB# Pro00023791. The subsection "RRMS patient's information and qPCR analysis" in Online Method.
2. Is demographic information on all subjects provided?  
Where (section, paragraph #)?  

We described that the MURDOCK cohort was used and described the website of the MURDOCK study for detailed information in the subsection "RRMS patient's information and qPCR analysis" in Online Method.
3. Is the number of human subjects, their age and sex clearly defined?  
Where (section, paragraph #)?  

Defined in the subsection "RRMS patient's information and qPCR analysis" in Online Method.
4. Are the inclusion and exclusion criteria (if any) clearly specified?  
Where (section, paragraph #)?  

Specified in the subsection "RRMS patient's information and qPCR analysis" in Online Method.
5. How well were the groups matched?  
Where is this information described (section, paragraph #)?  

Description of age and sex matching is described in the subsection "RRMS patient's information and qPCR analysis" in Online Method.
6. Is a statement included confirming that informed consent was obtained from all subjects?  
Where (section, paragraph #)?  

Included in the subsection "RRMS patient's information and qPCR analysis" in Online Method.
7. For publication of patient photos, is a statement included confirming that consent to publish was obtained?  
Where (section, paragraph #)?  

No patient photos included.

## ▶ fMRI studies

For papers reporting functional imaging (fMRI) results please ensure that these minimal reporting guidelines are met and that all this information is clearly provided in the methods:

1. Were any subjects scanned but then rejected for the analysis after the data was collected?  

No fMRI study performed.

  - a. If yes, is the number rejected and reasons for rejection described?  
Where (section, paragraph #)?
2. Is the number of blocks, trials or experimental units per session and/or subjects specified?  
Where (section, paragraph #)?
3. Is the length of each trial and interval between trials specified?

4. Is a blocked, event-related, or mixed design being used? If applicable, please specify the block length or how the event-related or mixed design was optimized.
5. Is the task design clearly described?  
Where (section, paragraph #)?
6. How was behavioral performance measured?
7. Is an ANOVA or factorial design being used?
8. For data acquisition, is a whole brain scan used?  
If not, state area of acquisition.
  - a. How was this region determined?
9. Is the field strength (in Tesla) of the MRI system stated?
  - a. Is the pulse sequence type (gradient/spin echo, EPI/spiral) stated?
  - b. Are the field-of-view, matrix size, slice thickness, and TE/TR/flip angle clearly stated?
10. Are the software and specific parameters (model/functions, smoothing kernel size if applicable, etc.) used for data processing and pre-processing clearly stated?
11. Is the coordinate space for the anatomical/functional imaging data clearly defined as subject/native space or standardized stereotaxic space, e.g., original Talairach, MNI305, ICBM152, etc? Where (section, paragraph #)?
12. If there was data normalization/standardization to a specific space template, are the type of transformation (linear vs. nonlinear) used and image types being transformed clearly described? Where (section, paragraph #)?
13. How were anatomical locations determined, e.g., via an automated labeling algorithm (AAL), standardized coordinate database (Talairach daemon), probabilistic atlases, etc.?
14. Were any additional regressors (behavioral covariates, motion etc) used?
15. Is the contrast construction clearly defined?
16. Is a mixed/random effects or fixed inference used?

- a. If fixed effects inference used, is this justified?
17. Were repeated measures used (multiple measurements per subject)?
- a. If so, are the method to account for within subject correlation and the assumptions made about variance clearly stated?
18. If the threshold used for inference and visualization in figures varies, is this clearly stated?
19. Are statistical inferences corrected for multiple comparisons?
- a. If not, is this labeled as uncorrected?
20. Are the results based on an ROI (region of interest) analysis?
- a. If so, is the rationale clearly described?
- b. How were the ROI's defined (functional vs anatomical localization)?
21. Is there correction for multiple comparisons within each voxel?
22. For cluster-wise significance, is the cluster-defining threshold and the corrected significance level defined?

## ► Additional comments

---

Additional Comments
